1 **Decreased Activity of the *Ghrhr* and *Gh* Promoters Causes**  
2 **Dominantly Inherited GH Deficiency**

3

4 Daisuke Ariyasu<sup>1,2</sup>, Emika Kubo<sup>1</sup>, Daisuke Higa<sup>1</sup>, Shinsuke Shibata<sup>3</sup>, Yutaka Takaoka<sup>4</sup>,  
5 Michihiko Sugimoto<sup>1</sup>, Kazunori Imaizumi<sup>5</sup>, Tomonobu Hasegawa<sup>6</sup>, and Kimi Araki<sup>1,7</sup>

6

7 <sup>1</sup>Division of Developmental Genetics, Institute of Resource Development and Analysis,  
8 Kumamoto University, Kumamoto, Japan

9 <sup>2</sup>Graduate School of Medicine, Keio University, Tokyo, Japan

10 <sup>3</sup>Electron Microscope Laboratory, Keio University School of Medicine, Tokyo, Japan

11 <sup>4</sup>Division of Medical Informatics and Bioinformatics, Kobe University Hospital, Hyogo, Japan

12 <sup>5</sup>Department of Biochemistry, Graduate School of Biomedical and Health Sciences,  
13 Hiroshima University, Hiroshima, Japan

14 <sup>6</sup>Keio University School of Medicine, Tokyo, Japan

15 <sup>7</sup>Center for Metabolic Regulation of Healthy Aging, Kumamoto University Faculty of Life  
16 Sciences, Kumamoto, Japan

17

18 To whom correspondence should be addressed: Kimi Araki, Division of Developmental  
19 Genetics, Institute of Resource Development and Analysis, Kumamoto University, 2-2-1,  
20 Honjo, Kumamoto, 860-0811, Japan. Tel.: +81.96.373.6598; Fax: +81.96.373.6599 E-mail:  
21 arakimi@gpo.kumamoto-u.ac.jp

22

23 Running title: ER-localized mutant GH decreases GH1 mRNA

24

## 25 Abstract

26

27 Isolated growth hormone deficiency type II (IGHD2) is mainly caused by  
28 heterozygous splice-site mutations in intron 3 of the *GH1* gene. A dominant negative  
29 effect of the mutant growth hormone (GH) lacking exon 3 on wild-type GH secretion has  
30 been proposed; however, the molecular mechanisms involved are elusive. To uncover  
31 the molecular systems underlying GH deficiency in IGHD2, we established IGHD2  
32 model mice, which carry both wild-type and mutant copies of the human *GH1* gene,  
33 replacing each of the endogenous mouse *Gh* loci. Our IGHD2 model mice exhibited  
34 growth retardation associated with intact cellular architecture and mildly activated ER  
35 stress in the pituitary gland, caused by decreases in the growth hormone releasing  
36 hormone receptor (*Ghrhr*) and *Gh* gene promoter activities. Decreases in *Ghrhr* and *Gh*  
37 promoter activities were likely caused by reduced levels of nuclear CREB3L2, which  
38 was demonstrated to stimulate the activity of the *Ghrhr* and *Gh* promoters. This is the  
39 first *in vivo* study revealing a novel molecular mechanism of GH deficiency in IGHD2,  
40 representing a new paradigm, differing from widely accepted models.

41

42 Key Words: dominant negative effect/ endoplasmic reticulum stress/ growth hormone/  
43 growth hormone releasing hormone receptor/ isolated growth hormone deficiency type  
44 II

45

## 46 Introduction

47

48 Isolated growth hormone deficiency type II (IGHD2) is a dominantly inherited  
49 growth hormone (GH) deficiency, first described in 1994, and mainly caused by  
50 heterozygous splice-site mutations in intron 3 of the *GH1* gene (Binder & Ranke, 1995;  
51 Cogan et al, 1994). The wild-type *GH1* allele transcript includes 5 exons and produces a  
52 22-kDa wild-type GH protein; however, the mutant *GH1* allele transcript generates a  
53 17.5-kDa exon 3 deletion-mutant GH ( $\Delta 3$  GH), as a result of in-frame skipping of exon 3.  
54 The fact that patients harboring a deletion in one *GH1* allele exhibit normal stature  
55 indicates that a single wild-type *GH1* allele is sufficient to produce normal levels of  
56 wild-type GH secretion (Akinci et al, 1992); however, patients with IGHD2 have low  
57 serum concentrations of wild-type GH, despite having a wild-type *GH1* allele. Thus, it  
58 has been suggested that  $\Delta 3$  GH exerts a dominant negative effect on wild-type GH  
59 secretion; however, the precise molecular mechanisms involved have remained elusive  
60 for more than 20 years.

61 Several *in vitro* studies have demonstrated that  $\Delta 3$  GH is not secreted  
62 extracellularly (Graves et al, 2001; Iliev et al, 2005; Kannenberg et al, 2007; Mullis et al,  
63 2002; Salemi et al, 2006), suggesting that the dominant negative effect of  $\Delta 3$  GH is  
64 exerted within somatotropic cells of the pituitary, where GH is generated. Generally,  
65 mutant proteins exert dominant negative effects on secretory pathways of wild-type  
66 factors at the protein level (Deladoey et al, 2001; Ito et al, 1999; Jacobson et al, 1997),  
67 which has led many researchers to focus on wild-type and  $\Delta 3$  GH protein interactions,  
68 such as heterodimer formation; however, no study has yet demonstrated definitive  
69 evidence of heterodimers comprising wild-type and  $\Delta 3$  GH proteins. At present, it is  
70 widely accepted that  $\Delta 3$  GH itself is not harmful to somatotroph (Graves et al, 2001),  
71 and that wild-type GH contributes to the degradation of  $\Delta 3$  GH via protein interactions,  
72 leading to impairment of the wild-type GH secretory pathway (Kannenberg et al, 2007;  
73 McGuinness et al, 2003).

74 In contrast, previous *in vitro* studies revealed that  $\Delta 3$  GH localizes to the  
75 endoplasmic reticulum (ER), due to its aberrant protein structure (Graves et al, 2001;  
76 Salemi et al, 2006), and is degraded by the proteasome (Ariyasu et al, 2013;  
77 Kannenberg et al, 2007), indicating that  $\Delta 3$  GH potentially causes ER stress in the  
78 somatotroph. We previously demonstrated the involvement of ER stress and apoptosis  
79 in IGHD2, using rat GH4C1 cells stably expressing wild-type GH and  $\Delta 3$  GH (Ariyasu et  
80 al, 2013), indicating that  $\Delta 3$  GH itself impairs ER functions *in vitro*, without the  
81 involvement of wild-type GH, inconsistent with the widely accepted hypothesis  
82 described above.

83 Since GH secretion is regulated by growth hormone releasing hormone (GHRH)  
84 signaling, it is important to establish a usable model that includes the  
85 hypothalamus-pituitary axis. One *in vitro* study has authentically mimicked the  
86 hypothalamus-pituitary axis (Petkovic et al, 2010); however, *in vivo* animal models are  
87 imperative to clarify the molecular mechanisms involved in the GH deficiency of IGHD2.  
88 McGuinness *et al.* established  $\Delta 3$  GH transgenic mice and reported that they exhibited  
89 widespread pituitary damage and severe macrophage invasion (McGuinness et al,  
90 2003). This mouse model had been the sole *in vivo* model used to represent the human  
91 IGHD2 phenotype. *In vivo* studies have been performed using this model, including  $\Delta 3$   
92 GH knockdown by shRNA (Lochmatter et al, 2010), and altering splicing efficiency using  
93 butyrate (Miletta et al, 2016), which ameliorated impaired GH secretion; however, the  
94 mechanisms underlying IGHD2 have not been determined *in vivo* (Miletta et al, 2017).

95 To clarify the molecular processes causing impaired GH secretion in IGHD2, we  
96 established IGHD2 model mice by exchanging endogenous mouse *Gh* genes for the

97 human wild-type *GH1* (*wtGH1*) and mutant *GH1* ( $\Delta 3GH1$ ; generates  $\Delta 3$  GH) genes,  
98 using the 'gene exchange system' previously reported by our laboratory (Araki et al,  
99 2002). Our IGHD2 model mice demonstrated significant growth failure, associated with  
100 a marked decrease in *wtGH1* mRNA, and no apoptosis was detected in the pituitary  
101 glands, despite the clear growth retardation phenotype.

102 Here, we show that  $\Delta 3$  GH decreases transcription from the growth hormone  
103 releasing hormone receptor (*Ghrhr*) gene promoter, which has a fundamental role in  
104 somatotroph proliferation, as well as *GH1* gene transcription, leading to impaired GH  
105 production before birth in IGHD2 model mice. These decreases in promoter activity  
106 were mediated by a reduction in nuclear CREB3L2, one of the Creb3 family of bZip  
107 transcription factors, which was found to stimulate transcription from the *Ghrhr* and the  
108 *Gh* promoters coordinately with POU class 1 homeobox 1 (POU1F1). This is the first *in*  
109 *vivo* study to reveal a novel molecular mechanism underlying GH deficiency in IGHD2,  
110 and provides a new paradigm, different from the widely accepted model.

111

## 112 **Results**

113

### 114 **IGHD2 model mice exhibited mild growth retardation**

115 To establish a mouse model that authentically demonstrates the  $\Delta 3$  GH-mediated  
116 dominant negative effect observed in IGHD2, one each of the mouse endogenous *Gh*  
117 gene alleles was exchanged for the human *wtGH1* and  $\Delta 3GH1$  genes, using the gene  
118 exchange system previously reported by our laboratory (Araki et al, 2002). Briefly, we  
119 inserted a *neoR* gene cassette, flanked by a left-element mutated *loxJT15* and *loxP* site,  
120 at the *Gh* gene locus by homologous recombination, producing a mouse *Gh* knock-out  
121 (KO) allele (*Gh*<sup>-</sup>) (Fig EV1A and C). Then, we constructed gene exchange vectors,  
122 containing right-element mutated *loxKR3* and the *wtGH1* or  $\Delta 3GH1$  genes, followed by  
123 a puromycin resistance gene and the *loxP* site (Fig EV1A and C). The *neoR* gene  
124 cassette was exchanged for the *wtGH1* or  $\Delta 3GH1$  genes using Cre-mediated  
125 recombination (Fig EV1A and B). Since recombination between *loxJT15* and *loxKR3*  
126 produced a *lox* site with both sides mutated, which is resistant to Cre-mediated excision,  
127 we were able to efficiently generate recombined embryonic stem (ES) cell clones (Fig  
128 EV1A) (Araki et al, 2002).

129 Schematic representations of the original mouse endogenous *Gh* allele (*Gh*<sup>+</sup>), KO  
130 allele (*Gh*<sup>-</sup>), and exchanged human *GH1* alleles (*Gh*<sup>wtGH1</sup> or *Gh* <sup>$\Delta 3GH1$</sup> ) are presented in  
131 Fig 1A. By crossing *Gh*<sup>+/-</sup>, *Gh*<sup>+/*wtGH1*</sup>, and *Gh*<sup>+/ $\Delta 3GH1$</sup>  mice, we successfully established  
132 *Gh*<sup>wtGH1/*wtGH1*</sup> mice (human healthy control model), *Gh*<sup>wtGH1/-</sup> mice (*GH1* heterozygous

133 deletion model),  $Gh^{wtGH1/\Delta3GH1}$  mice (IGHD2 model), and  $Gh^{-/-}$  mice ( $GH1$  homozygous  
134 deletion model). The body weights and body lengths of these model mice are shown in  
135 Fig 1B and C.  $Gh^{-/-}$  mice demonstrated severe postnatal growth retardation, associated  
136 with serum insulin-like growth factor 1 (IGF-1) levels below the detection range,  
137 indicating that, as in humans, postnatal growth in mice is dependent on GH activity (Fig  
138 1B–E).  $Gh^{wtGH1/wtGH1}$  and  $Gh^{wtGH1/-}$  mice showed longitudinal growth and serum IGF-1  
139 levels comparable with those of  $Gh^{+/+}$  mice, suggesting that the human wild-type GH  
140 molecule is capable of binding the mouse GH receptor and producing IGF-1, and that  
141 one exchanged human wild-type  $GH1$  allele is sufficient for IGF-1-mediated longitudinal  
142 growth in mice (Fig 1B–E).  $Gh^{wtGH1/\Delta3GH1}$  mice exhibited mild growth retardation,  
143 associated with significantly reduced serum IGF-1 values, which were intermediate  
144 between those of  $Gh^{wtGH1/wtGH1}$  and  $Gh^{-/-}$  mice (Fig 1B–E). These data indicate that  
145  $Gh^{wtGH1/\Delta3GH1}$  mice successfully demonstrate the dominant negative effect of  $\Delta3$  GH, and  
146 that the growth retardation of  $Gh^{wtGH1/\Delta3GH1}$  mice is caused by impaired GH activity.

147 We also established  $Gh^{mGh/\Delta3GH1}$  mice, in which the mouse  $Gh$  gene was inserted  
148 at the endogenous mouse  $Gh$  locus, using the gene exchange system in a similar way  
149 to that used to obtain  $Gh^{wtGH1/\Delta3GH1}$  mice (Fig EV1A).  $Gh^{mGh/\Delta3GH1}$  mice also  
150 demonstrated growth failure, as for  $Gh^{wtGH1/\Delta3GH1}$  mice, although  $Gh^{+/\Delta3GH1}$  mice did not  
151 (Fig EV1E). The phenotypic discrepancy between  $Gh^{+/\Delta3GH1}$  and  $Gh^{mGh/\Delta3GH1}$  mice was  
152 attributable to a significant difference in the abundance of mRNA transcribed from the  
153 endogenous and exchanged  $Gh$  alleles, as demonstrated by qRT-PCR (Fig EV1F). In  
154 this study, we used mouse lines in which both alleles were exchanged for human  $GH1$   
155 genes, because the transcriptional efficiencies of the  $wtGH1$  and  $\Delta3GH1$  alleles were  
156 basically equivalent in human IGHD2 patients. These decreases in transcriptional  
157 efficiency of the exchanged human  $GH1$  genes did not cause the growth failure in  
158  $Gh^{wtGH1/wtGH1}$  mice (Fig 1B and C), and IGF-1 levels in  $Gh^{wtGH1/wtGH1}$  mice were  
159 comparable with those in  $Gh^{+/+}$  mice (Fig 1D), indicating that  $wtGH1$  mRNA expression  
160 levels were sufficient for production of human wild-type GH protein, required for the  
161 IGF-1-mediated longitudinal growth of mice.

162

### 163 **The growth retardation of $Gh^{wtGH1/\Delta3GH1}$ mice is caused by decreased $wtGH1$ mRNA** 164 **expression**

165 We evaluated the expression levels of wild-type and  $\Delta3$  GH proteins in pituitary  
166 glands at 4 weeks of age, the period in which  $Gh^{wtGH1/\Delta3GH1}$  mice demonstrated  
167 significant growth retardation, based on their growth curves (Fig 1B and C).  
168 Immunoblotting showed significant decreases in the content of the 22 kDa wild-type GH

169 in whole  $Gh^{wtGH1/\Delta 3GH1}$  pituitary, compared with  $Gh^{wtGH1/wtGH1}$  and  $Gh^{wtGH1/-}$  pituitaries (Fig  
170 2A left and B), indicating that the growth retardation of  $Gh^{wtGH1/\Delta 3GH1}$  mice was caused by  
171 impaired GH production in the somatotroph.  $\Delta 3$  GH expression was barely detected by  
172 long exposure (Fig 2A right), despite comparable affinities of the anti-GH antibody for  
173 wild-type and  $\Delta 3$  GH proteins (Fig EV2A). Immunostaining revealed that both the  
174 wild-type GH content in each somatotroph and the number of somatotrophs were  
175 reduced in  $Gh^{wtGH1/\Delta 3GH1}$ , compared with  $Gh^{wtGH1/wtGH1}$  pituitaries (Fig 2C).

176 Since we had demonstrated impaired production of wild-type GH in  $Gh^{wtGH1/\Delta 3GH1}$   
177 pituitary, we next evaluated *GH1* transcript levels. Using whole pituitary glands from  
178 4-week-old animals, RT-PCR detecting both the *wtGH1* and  $\Delta 3GH1$  transcripts, with a  
179 sense primer in exon 1 and an antisense primer in exon 5, revealed markedly  
180 decreased *wtGH1* transcript levels in the  $Gh^{wtGH1/\Delta 3GH1}$  pituitary, compared with those in  
181  $Gh^{wtGH1/wtGH1}$  and  $Gh^{wtGH1/-}$  pituitaries (Fig 2D). qRT-PCR analysis, detecting the *wtGH1*  
182 mRNA alone, using a sense primer in exon 3 and an antisense primer spanning exons 3  
183 and 4, also demonstrated that the abundance of the *wtGH1* mRNA in  $Gh^{wtGH1/\Delta 3GH1}$   
184 pituitary was approximately one sixth of that in  $Gh^{wtGH1/wtGH1}$  pituitary in 4-week-old  
185 animals (Fig 2E). Decreases in *wtGH1* mRNA levels in  $Gh^{wtGH1/\Delta 3GH1}$  pituitaries were  
186 demonstrated from embryonic day E19.5 to 4 weeks of age (Fig 2F), suggesting that  
187 GH production in  $Gh^{wtGH1/\Delta 3GH1}$  pituitaries was already impaired before birth. *In situ*  
188 hybridization analysis to detect *wtGH1* mRNA using an RNA probe for *GH1* exon 3, in  
189 E19.5 and 4-week-old pituitaries, revealed that both the abundance of *wtGH1* mRNA in  
190 each somatotroph and the number of somatotrophs were decreased in  $Gh^{wtGH1/\Delta 3GH1}$   
191 pituitaries, consistent with the results of immunostaining (Fig 2C and G). These data  
192 indicate that the impaired production of wild-type GH in  $Gh^{wtGH1/\Delta 3GH1}$  pituitary is caused  
193 by a decrease in *wtGH1* mRNA.

194 RT-PCR showed that levels of the *wtGH1* and  $\Delta 3GH1$  transcripts were  
195 comparable (Fig 2D); however, immunoblotting revealed that expression of the  $\Delta 3$  GH  
196 protein was drastically reduced compared with that of wild-type GH protein in  
197  $Gh^{wtGH1/\Delta 3GH1}$  pituitaries (Fig 2A). These data indicate that  $\Delta 3$  GH is degraded in the  
198 somatotroph, and that wild-type GH is not involved in the degradation, inconsistent with  
199 the currently accepted hypothesis. Thus, to evaluate whether wild-type GH  
200 preferentially interacts with  $\Delta 3$  GH, 3-D protein structures of wild-type and  $\Delta 3$  GH were  
201 analyzed under pH conditions in the ER and docking simulation analysis was conducted  
202 using ZDOCK (Chen et al, 2003; Nakamura et al, 2017). The average binding affinity  
203 score for heterodimers of wild-type and  $\Delta 3$  GH was significantly lower than that for the  
204 wild-type GH homodimer (Table 1), indicating that wild-type and  $\Delta 3$  GH heterodimer

205 formation is unlikely to be involved in impaired GH secretion in IGHD2.

206

207 **Electron microscopy reveals markedly decreased numbers of secretory vesicles**  
208 **and enlarged ER in  $Gh^{wtGH1/\Delta3GH1}$  pituitaries**

209 Considering the possibility that somatotroph loss due to apoptosis, necrosis, and  
210 inflammation, contribute to the decrease in *wtGH1* mRNA described above, we  
211 conducted histological evaluation of pituitary glands (Fig 3). Stereomicroscopic analysis  
212 of four-week-old  $Gh^{wtGH1/\Delta3GH1}$  pituitaries revealed a slightly atrophic and  
213 semi-translucent appearance, which was intermediate between those of  $Gh^{wtGH1/-}$  and  
214  $Gh^{-/-}$  mice, consistent with the decreased somatotroph number in  $Gh^{wtGH1/\Delta3GH1}$  mice  
215 described above (Fig 3A); however, the decrease in somatotroph number was not  
216 caused by somatotroph loss, since hematoxylin-eosin staining demonstrated that the  
217 cellular architecture was intact, with no signs of necrosis or inflammation. Further,  
218 analysis by TdT-mediated dUTP nick end labeling (TUNEL) assay revealed that the  
219 decrease in the *wtGH1* mRNA in  $Gh^{wtGH1/\Delta3GH1}$  mice was not associated with apoptosis  
220 (Fig 3B).

221 The absence of somatotroph loss in  $Gh^{wtGH1/\Delta3GH1}$  mice led us to evaluate the  
222 characteristics of the cellular organelles in pituitary glands using transmission electron  
223 microscopy (TEM). TEM images of 4-week-old  $Gh^{wtGH1/wtGH1}$  pituitary glands showed  
224 intact cell organelles, including appropriately developed rough ER, and many secretory  
225 vesicles containing mature wild-type GH protein (Fig 3C). In contrast, images of  
226  $Gh^{wtGH1/\Delta3GH1}$  pituitary glands revealed a clear decrease in the number of secretory  
227 vesicles, abnormal enlargement of the rough ER, and protein aggregates in the cytosol  
228 (Fig 3C). To evaluate the impact of  $\Delta3$  GH itself on cellular morphology, we obtained  
229  $Gh^{\Delta3GH1/-}$  mice by crossing  $Gh^{wtGH1/-}$  and  $Gh^{wtGH1/\Delta3GH1}$  animals. In contrast to the current  
230 understanding that  $\Delta3$  GH itself is not harmful to somatotroph, TEM images of  $Gh^{\Delta3GH1/-}$   
231 pituitaries revealed extreme enlargement of the rough ER and protein aggregates in the  
232 cytosol, whereas such abnormalities were not visible in  $Gh^{-/-}$  pituitaries (Fig 3D). The  
233 observed protein aggregates were connected to the ER (Fig 3E), suggesting that the  
234 proteins accumulated in the ER were retro-translocated to the cytosol, leading to  
235 aggregate formation. These data led us to confirm the cellular localization of  $\Delta3$  GH by  
236 immunofluorescence analysis. Using  $Gh^{wtGH1/\Delta3GH1-myc}$  mice, expressing  $\Delta3$  GH with a  
237 C-terminal myc tag (Fig EV1A),  $\Delta3$  GH was also demonstrated to localize within the ER  
238 *in vivo* (Fig 3F).

239 To evaluate the contents of the protein aggregates in the cytosol, we dissociated  
240  $Gh^{wtGH1/\Delta3GH1}$  anterior pituitary cells and separated them into soluble and insoluble

241 fractions, in the presence or absence of treatment with the proteasome inhibitor, MG132,  
242 and evaluated the distributions of wild-type and  $\Delta 3$  GH by immunoblotting, because  
243 several studies have demonstrated that cytosolic protein aggregates have low solubility  
244 (Ariyasu et al, 2013; Imai et al, 2001; Kannenberg et al, 2007; Ward et al, 1995). A  
245 significant proportion of  $\Delta 3$  GH was detected in the insoluble fraction following MG132  
246 treatment, although the majority of wild-type GH was sorted into the soluble fraction (Fig  
247 EV2B). These data suggest that ER-localized  $\Delta 3$  GH is degraded by the proteasome,  
248 leading to  $\Delta 3$  GH aggregation, which overwhelms the degradative capacity in the  
249 cytosol, and that most wild-type GH is not involved in the aggregates.

250

### 251 **$\Delta 3$ GH-mediated ER stress is not a direct cause of the growth failure of** 252 **$Gh^{wtGH1/\Delta 3GH1}$ mice**

253 The enlargement of the rough ER and  $\Delta 3$  GH aggregates in the cytosol suggest  
254 that the  $Gh^{wtGH1/\Delta 3GH1}$  somatotrophs are under ER stress, and we have previously shown  
255 that  $\Delta 3$  GH causes ER stress to the somatotroph *in vitro* (Ariyasu et al, 2013). These  
256 data led us to investigate  $\Delta 3$  GH-mediated ER stress *in vivo*. PKR-like endoplasmic  
257 reticulum kinase (PERK), activating transcription factor 6 (ATF6), and inositol  
258 requirement 1 (IRE1), are well-characterized ER membrane-located proteins which  
259 sense ER stress. In the presence of ER stress, PERK is activated by  
260 trans-autophosphorylation, ATF6 activates expression of the ER chaperone  
261 immunoglobulin heavy-chain binding protein (BiP), and IRE1 activates splicing of X-box  
262 binding protein 1 (*Xbp1*) mRNA via the PERK, ATF6, and IRE1 pathways, respectively  
263 (Ariyasu et al, 2017; Yoshida, 2007). PERK phosphorylation can be detected by  
264 immunoblotting, as phosphorylated PERK is associated with a mobility shift during  
265 SDS-PAGE (Harding et al, 1999). Immunoblotting revealed that the PERK was  
266 phosphorylated in 2 and 4-week-old  $Gh^{wtGH1/\Delta 3GH1}$  pituitary glands (Fig 4A). Further,  
267 qRT-PCR demonstrated a significant increase in *BiP* mRNA abundance in 4-week-old  
268  $Gh^{wtGH1/\Delta 3GH1}$  pituitary (Fig 4B). *Xbp1* mRNA splicing was evaluated by competitive  
269 RT-PCR, using primers flanking the 26 bp sequence spliced out by IRE1 $\alpha$  (Yoshida et al,  
270 2001). *Xbp1* mRNA splicing was significantly increased at 1, 2, and 4 weeks of age in  
271  $Gh^{wtGH1/\Delta 3GH1}$  pituitaries (Fig 4C and D).

272 These data suggest that  $\Delta 3$  GH can activate the three major ER stress pathways  
273 *in vivo*; however, activation of these ER stress pathways is not sufficiently strong to  
274 cause somatotroph apoptosis, since no apoptotic cells were detected by TUNEL assay,  
275 as described above (Fig 3B), and no caspase-3 activation was detected in  $Gh^{wtGH1/\Delta 3GH1}$   
276 pituitary glands by immunoblotting (Fig 4A). In other established ER stress-related



277 endocrine diseases, apoptosis is required to cause organ dysfunction (Ariyasu et al,  
278 2017; Fonseca et al, 2010; Hayashi et al, 2009; Oyadomari et al, 2002; Yoshida, 2007).  
279 These data suggest that  $\Delta 3$  GH-mediated ER stress is not likely to be causally related  
280 to the growth retardation in  $Gh^{wtGH1/\Delta 3GH1}$  mice.

281

282 **Decreased *Ghrhr* gene promoter activity contributes to decreased *wtGH1* gene**  
283 **expression in  $Gh^{wtGH1/\Delta 3GH1}$  mice**

284 Our data (described above) indicate that  $\Delta 3$  GH itself can decrease *wtGH1* mRNA  
285 levels, without interacting with wild-type GH protein, ER stress, or apoptosis. RT-PCR  
286 revealed that both *wtGH1* and  $\Delta 3GH1$  mRNA were equally decreased in  $Gh^{wtGH1/\Delta 3GH1}$   
287 pituitary (Fig 2D), leading us to evaluate the expression levels of genes contributing to  
288 upstream regulation of *GH1* gene transcription.

289 As *wtGH1* mRNA was primarily decreased in  $Gh^{wtGH1/\Delta 3GH1}$  somatotroph, we would  
290 expect the *Ghrhr* gene to be overexpressed, because of negative feedback  
291 mechanisms reflecting the GH deficiency in this tissue. Consistent with this hypothesis,  
292 4-week-old  $Gh^{-/-}$  mice had significantly increased abundance of *Ghrhr* mRNA compared  
293 with  $Gh^{wtGH1/wtGH1}$  mice, because of a negative feedback mechanism, reflecting their  
294 complete GH deficiency (Fig 5A lane 1 and 3, and B). However,  $Gh^{wtGH1/\Delta 3GH1}$  mice  
295 demonstrated significantly decreased *Ghrhr* mRNA compared with  $Gh^{wtGH1/wtGH1}$  mice,  
296 despite their marked GH deficiency (Fig 5A lane 1 and 2, and B). These data suggest  
297 that the decrease in *wtGH1* mRNA in  $Gh^{wtGH1/\Delta 3GH1}$  pituitary is mediated, at least in part,  
298 by that of *Ghrhr* mRNA. In agreement with this hypothesis,  $Gh^{\Delta 3GH1/-}$  mice demonstrated  
299 significantly decreased abundance of *Ghrhr* mRNA, compared with  $Gh^{-/-}$  mice, despite  
300 the fact that both strains lack the ability to secrete wild-type GH (Fig 5A lane 3 and 4,  
301 and B). Note that  $Gh^{\Delta 3GH1/-}$  mice demonstrate exactly the same degree of growth  
302 retardation as  $Gh^{-/-}$  mice, because  $\Delta 3$  GH is not secreted (Fig 5C and EV2C). Further,  
303 the decrease in both the abundance of *wtGH1* mRNA in each somatotroph and the  
304 number of somatotrophs in  $Gh^{wtGH1/\Delta 3GH1}$  pituitaries (Fig 2G), can be explained by this  
305 decrease in *Ghrhr* mRNA, because GHRH signaling is essential for *GH1* gene  
306 transcription and somatotroph proliferation (Lin et al, 1993). Taken together,  $\Delta 3$  GH  
307 contributes to decreased *Ghrhr* mRNA levels, without the assistance of wild-type GH,  
308 leading to the impaired GHRH signaling and reduced *wtGH1* transcription in  
309  $Gh^{wtGH1/\Delta 3GH1}$  somatotroph.

310 To evaluate the mechanisms underlying decreases in *Ghrhr* mRNA, a mouse  
311 model with the *LacZ* gene knocked in to the *Ghrhr* gene locus ( $Ghrhr^{+/LacZ}$ ) was  
312 established using the CRISPR/Cas9 gene editing system (Fig EV3A and B). E19.5 and

313 4-week-old *Ghrhr*<sup>+/-LacZ</sup>;*Gh*<sup>wtGH1/Δ3GH1</sup> pituitary showed significantly decreased X-gal  
314 staining compared with *Ghrhr*<sup>+/-LacZ</sup>;*Gh*<sup>wtGH1/wtGH1</sup> pituitary, indicating that the decreased  
315 *Ghrhr* mRNA levels are caused by a reduction in *Ghrhr* promoter activity (Fig 5D).

316

### 317 **Nuclear expressions of CREB3L2 is decreased in *Gh*<sup>wtGH1/Δ3GH1</sup> pituitary glands**

318 The decreased *Ghrhr* promoter activity detected in *Gh*<sup>wtGH1/Δ3GH1</sup> mice suggests  
319 that the expression of nuclear transcription factors crucial for the *Ghrhr* expression is  
320 disturbed by ER-localized Δ3 GH (Fig 5D). Furthermore, the abnormal cellular  
321 organelles and mildly activated ER stress pathway caused by Δ3 GH, indicate that Δ3  
322 GH causes a deterioration in ER function by inducing ER stress (Fig 3C–E, Fig 4A–D).  
323 Immunoblotting revealed that abundance of the nuclear POU1F1 protein, a well-known  
324 transcription factor involved in regulation of *Ghrhr* and *Gh* promoter activities, was  
325 comparable in 4-week-old *Gh*<sup>wtGH1/wtGH1</sup> and *Gh*<sup>wtGH1/Δ3GH1</sup> pituitaries (Fig EV3C),  
326 suggesting that other, unknown, pituitary transcription factors were involved in the  
327 decreased *Ghrhr* promoter activity in *Gh*<sup>wtGH1/Δ3GH1</sup> mice. These data led us to focus on  
328 the Creb3 family of bZip transcription factors, a recently described family of ER stress  
329 transducers, all of which are ER-bound factors that undergo proteolysis in the Golgi  
330 apparatus, leading to production of active N-terminal fragments, which translocate to  
331 the nucleus and activate transcription of target genes (Kondo et al, 2011). Five Creb3  
332 family members, CREB3/LUMAN, CREB3L1/OASIS, CREB3L2/BBF2H7,  
333 CREB3L3/CREBH, and CREB3L4/TISP40, have been identified to date (DenBoer et al,  
334 2005; Kondo et al, 2005; Kondo et al, 2007; Nagamori et al, 2005; Omori et al, 2001).

335 Of these, CREB3L1 and CREB3L2 are essential for the differentiation and  
336 proliferation of osteoblasts and chondrocytes, respectively. Active N-terminal fragments  
337 of CREB3L1 and CREB3L2 bind to cAMP response element (CRE)-like sequences in  
338 the promoter regions of target genes, and enhance their expression in osteoblasts and  
339 chondrocytes, respectively (Murakami et al, 2009; Saito et al, 2009). Interestingly,  
340 *Creb3l1* KO mice display mild growth failure, which is not rescued by osteoblast-specific  
341 *Creb3l1* overexpression, but can be ameliorated by exogenous GH treatment,  
342 suggesting that they have impaired GH secretion (Murakami et al, 2011). Furthermore,  
343 TEM images of *Creb3l1*-deficient osteoblasts and *Creb3l2*-deficient chondrocytes  
344 showed abnormal enlarged ER (Murakami et al, 2009; Saito et al, 2009), similar to  
345 those detected in *Gh*<sup>wtGH1/Δ3GH1</sup> somatotroph. These similarities between *Gh*<sup>wtGH1/Δ3GH1</sup>  
346 and Creb3 family KO mice led us to hypothesize that one or more Creb3 family  
347 members are crucial for *Ghrhr* gene expression, and that the growth failure of  
348 *Gh*<sup>wtGH1/Δ3GH1</sup> mice is mediated by decreased levels of nuclear active N-terminal Creb3

349 protein fragments.

350 RT-PCR analysis of pituitary glands from 4-week-old C57BL/6 mice revealed that  
351 the *Creb3l1* and *Creb3l2* genes were strongly expressed in this tissue (Fig 6A). Next,  
352 we evaluated expression of these two genes in 4-week-old *Gh<sup>wtGH1/wtGH1</sup>* and  
353 *Gh<sup>wtGH1/Δ3GH1</sup>* pituitaries by qRT-PCR and immunoblotting. In *Gh<sup>wtGH1/Δ3GH1</sup>* pituitary, the  
354 abundance of *Creb3l1* mRNA was increased, while that of the N-terminal CREB3L1  
355 protein was comparable with levels in the *Gh<sup>wtGH1/wtGH1</sup>* pituitary (Fig 6B and C).  
356 Furthermore, in *Gh<sup>wtGH1/Δ3GH1</sup>* pituitary, *Creb3l2* mRNA levels were comparable, while  
357 those of N-terminal CREB3L2 protein were reduced, compared with *Gh<sup>wtGH1/wtGH1</sup>*  
358 pituitary (Fig 6B and C). Both CREB3L1 and CREB3L2 were demonstrated to be  
359 expressed in somatotroph by immunofluorescence (Fig EV3D). These data indicate that  
360 expression levels of N-terminal CREB3L1 and CREB3L2 proteins are disturbed in  
361 *Gh<sup>wtGH1/Δ3GH1</sup>* mice.

362 Since involvement of N-terminal CREB3L1 and CREB3L2 in GH production has  
363 not been described previously, we evaluated the impact of N-terminal CREB3L1 and  
364 CREB3L2 on *Ghrhr* and the *Gh* promoter activities *in vitro*. Luciferase assays revealed  
365 that N-terminal CREB3L2 strongly stimulated transcription from both the *Ghrhr* and *Gh*  
366 promoters, in combination with POU1F1 (Fig 6D). Decreased nuclear CREB3L2 levels  
367 were also demonstrated at embryonic stages in *Gh<sup>wtGH1/Δ3GH1</sup>* pituitary glands by  
368 immunoblotting. Ratios of N-terminal CREB3L2 to full-length CREB3L2 decreased in  
369 *Gh<sup>wtGH1/Δ3GH1</sup>* pituitary glands at embryonic day E19.5 (Fig 6E and F), indicating that  
370 translocation of CREB3L2 to the nucleus was disturbed by ER-localized Δ3 GH. *Sec23a*  
371 mRNA, an established target gene of nuclear CREB3L2, was also decreased in  
372 *Gh<sup>wtGH1/Δ3GH1</sup>* pituitary at E19.5 (Fig 6G). These data suggest that CREB3L2 stimulates  
373 *Ghrhr* and the *Gh* gene expression levels, and that impaired GH production in  
374 *Gh<sup>wtGH1/Δ3GH1</sup>* somatotroph is mediated by a decrease in nuclear CREB3L2 levels.

375

## 376 Discussion

377

378 The gene exchange system used in this study is a useful method for establishing  
379 mouse models of human diseases, because once researchers obtain a gene of interest  
380 flanked by mutated *lox* sites, they can easily exchange the endogenous genes with  
381 various human genes, via Cre-mediated integration. Using this system, we established  
382 a mouse model that expresses the *wtGH1* and *Δ3GH1* genes, instead of endogenous  
383 mouse *Gh*. *Gh<sup>wtGH1/Δ3GH1</sup>* mice have two advantages: 1) endogenous mouse GH is not  
384 produced and 2) one copy each of human wild-type GH and Δ3 GH are expressed

385 under the control of the *Gh* promoter. Thus,  $Gh^{wtGH1/\Delta 3GH1}$  mice are a genetically ideal  
386 model that mimics the growth patterns of human patients with IGHD2.

387 For functional analysis of secretory molecules regulated by feedback mechanisms  
388 involving in multiple tissues, such as GH, it is important to establish an applicable model  
389 that replicates the human disease as precisely as possible. Since patients with IGHD2  
390 were first described in 1994, many researchers have focused on interference of  
391 wild-type GH protein trafficking by  $\Delta 3$  GH, and several *in vitro* studies have been  
392 conducted to investigate the dominant negative effect of  $\Delta 3$  GH (Ariyasu et al, 2013;  
393 Graves et al, 2001; Hayashi et al, 1999; Iliev et al, 2005; Kannenberg et al, 2007; Lee et  
394 al, 2000; McGuinness et al, 2003; Salemi et al, 2006; Salemi et al, 2007); however, in  
395 these studies, wild-type and  $\Delta 3$  GH expression were driven by homeostatic promoters,  
396 such as the CMV promoter, and were thus independent of the feedback mechanisms  
397 that regulate GH expression *in vivo*. Furthermore, pituitary-derived cell lines, such as  
398 GC, GH3, GH4C1, and AtT-20, used in these studies do not express GHRHR. Thus,  
399 previous *in vitro* studies have been limited by the absence of feedback mechanisms  
400 mimicking those present *in vivo*.

401 The  $\Delta 3$  GH transgenic mice reported by McGuinness demonstrated massive  
402 pituitary damage (McGuinness et al, 2003); however, our  $Gh^{wtGH1/\Delta 3GH1}$  mice did not  
403 show similar somatotroph loss. The pituitary damage in the  $\Delta 3$  GH transgenic mice is  
404 likely caused by overexpression of the transgene, compared with endogenous mouse  
405 *Gh*, since our data indicate that  $\Delta 3$  GH caused GH deficiency, under conditions of  
406 comparable transcriptional efficiency between the mouse *Gh* and  $\Delta 3GH1$  alleles (Fig  
407 EV1E and F). Further, a previous study using cultured lymphocytes from patients with  
408 IGHD2 revealed that ratios of mutant to wild-type *GH1* transcripts were correlated with  
409 the severity of GH deficiency (Hamid et al, 2009).

410 In this study, we reveal two important findings: 1) Impaired GH secretion in  
411  $Gh^{wtGH1/\Delta 3GH1}$  mice is caused by decreased activity of the *Ghrhr* and *Gh* promoters; 2)  
412 these decreases in promoter activity are mediated by reduced levels of nuclear  
413 CREB3L2. A schematic representation of the molecular mechanisms underlying GH  
414 deficiency in IGHD2 is presented in Fig 7. Our data, including the abnormal TEM  
415 images and activated ER stress responses in  $Gh^{wtGH1/\Delta 3GH1}$  pituitary, indicate that  
416 ER-localized  $\Delta 3$  GH diminishes ER function by invoking ER stress.  $\Delta 3$  GH-mediated ER  
417 stress leads to a decrease in COPII vesicles, which are essential for ER-Golgi transport,  
418 because  $\Delta 3$  GH disturbs ER-Golgi transport (Graves et al, 2001) and COPII vesicles  
419 can be reduced under ER stress conditions (Shaheen, 2018). Full-length CREB3L2 is  
420 transported to the Golgi, where it is cleaved to produce the active N-terminal

421 transcription factor (Kondo et al, 2011); thus a decrease in ER-Golgi transport is  
422 expected to reduce nuclear N-terminal CREB3L2 levels, leading to downregulation of  
423 both *Ghrhr* and *GH1* gene transcription. The decreased levels of N-terminal CREB3L2  
424 disturb ER-Golgi transport in vicious cycle, since *Sec23a*, an established target gene of  
425 N-terminal CREB3L2, encodes SEC23, which is a COPII vesicle coat protein (Saito et al,  
426 2009). Decreased ER-Golgi transport will also influence intracellular protein trafficking  
427 of wild-type GH and GHRHR, exacerbating the impaired secretion of wild-type GH.  
428 Furthermore, decreased GHRH signaling contributes to GH deficiency through inhibition  
429 of somatotroph proliferation. In contrast, decreased  $\Delta 3GH1$  gene transcription limits the  
430 accumulation of  $\Delta 3$  GH in the ER, which likely protects the somatotroph from massive  
431 ER stress and apoptosis (Fig 7). To our knowledge, this is the first *in vivo* study that has  
432 come close to determining the molecular mechanisms underlying GH deficiency in  
433 IGHD2.

434 The involvement of other transcriptions factors, such as CREB3L1 and/or  
435 unknown molecules, in the reduction of *Ghrhr* and *Gh* promoter activities is possible.  
436 Creb3 members can interact with other bZip transcription factors as heterodimers, to  
437 coordinately stimulate transcription of target genes (Saito et al, 2012; Vecchi et al, 2009;  
438 Zhang et al, 2006). Hence, identifying the partner molecule of CREB3L2 will be  
439 necessary for complete elucidation of the molecular mechanisms involved in IGHD2 GH  
440 deficiency.

441 We presume that CREB3L2 has an important role in the differentiation and  
442 proliferation of somatotroph at the late embryonic stage, by stimulating *GHRHR* and  
443 *GH1* gene transcription and increasing their secretion, similar to its role in chondrocytes.  
444 Postnatal growth has not been described in *Creb3l2*-deficient mice because systemic  
445 *Creb3l2* KO mice are lethal soon after birth (Saito et al, 2009). Thus, establishment of  
446 somatotroph-specific *Creb3l2* conditional KO mice, and/or *Gh*<sup>wtGH1/ $\Delta 3GH1$</sup>  mice  
447 overexpressing *Creb3l2* specifically in the somatotroph, would be warranted in the  
448 future.

449 Interestingly, exon 3 of the *GH1* gene has weak splice sites, and a small amount  
450 of  $\Delta 3$  GH is produced in the pituitary glands, even in healthy individuals (Lecomte et al,  
451 1987; Ryther et al, 2004).  $\Delta 3$  GH may have a physiological role in preventing  
452 hyperproliferation of somatotroph and overexpression of the *GH1* gene, through the  
453 CREB3L2-mediated inhibition of *GHRHR* and *GH1* transcription.

454 This study has some limitations: 1) it remains unclear whether decreased activity  
455 of the *Ghrhr* and *Gh* promoters contributes to the GH deficiency in human IGHD2  
456 patients, because patient pituitary samples are not available. Establishment of

457 somatotrophs using induced pluripotent stem (iPS) cells derived from IGHD2 patients  
458 will help address this issue. 2) The observed decreases in transcriptional activity could  
459 be attributed to the influence of the gene exchange process (described in Fig EV1F) on  
460 amount of  $\Delta 3$  GH protein produced, and the cellular characteristics of somatotrophs.

461 In this study, CREB3L1 and CREB3L2 were demonstrated to be involved in GH  
462 production in somatotrophs. These findings suggest that patients with GH deficiency  
463 may have mutations in the *Creb3l1* or *Creb3l2* genes, or their binding sites in the *Ghrhr*  
464 and *Gh* promoters.

465 In conclusion, IGHD2 model mice, created using our gene exchange system,  
466 reveal a novel molecular mechanism underlying GH deficiency, where ER-localized  $\Delta 3$   
467 GH leads to decreased levels of nuclear CREB3L2, and a consequent reduction in the  
468 activities of the *Ghrhr* and *Gh* promoters.

469

## 470 **Materials and Methods**

471

### 472 **Isolation of the *wtGH1* and $\Delta 3GH1$ genes**

473 The *wtGH1* genomic sequence was amplified from healthy human control  
474 lymphocyte DNA using standard PCR methods with a sense primer (GH1-gf1) in the  
475 5'-untranslated region (UTR) and an antisense primer (GH1-gr1) including the  
476 termination codon. The  $\Delta 3GH1$  genomic sequence, which contains a c.291+1 g>a  
477 mutation, was created by mutagenesis, using sense (GH1IVS3-F) and antisense  
478 (GH1IVS3dsmut-R) primers containing the single nucleotide substitution. None of the  
479 nucleotide polymorphisms, reported to be significantly associated with adult height  
480 (Hasegawa et al, 2000) were included in the sequences. All primers used in this study  
481 are listed in Supplementary Table 1.

482

### 483 **Plasmids**

484 For KO of the *Gh* gene, the 5' (7 kb) and 3' (3 kb) arms were isolated by standard  
485 PCR methods, using a mouse bacterial artificial chromosome containing the *Gh* gene  
486 locus as a template, with sense (Gh-5arm-F and Gh-3arm-F) and antisense (Gh-5arm-R  
487 and Gh-3arm-R) primers. These 5' and 3' arms were inserted into the gene KO vector  
488 (Fig EV1A).

489 The *wtGH1*,  $\Delta 3GH1$ ,  $\Delta 3GH1$ -myc, or *Gh* gene genomic sequences were inserted  
490 to the cassette exchange vector using appropriate restriction enzymes.

491 To establish the mouse model with *LacZ* knocked-in at the *Ghrhr* gene locus, 5'  
492 (500 bp) and 3' (450 bp) arms were isolated by standard PCR methods, using sense

493 (Ghrhr-5arm-f5 and Ghrhr-3arm-f6) and antisense (Ghrhr-5arm-r5 and Ghrhr-3arm-r6)  
494 primers, and inserted into a plasmid containing the *LacZ* gene (Fig EV3A).

495 For CRISPR/Cas9 system plasmids, two pairs of oligonucleotides  
496 (Ghrhr-CRI-f1/r1, Ghrhr-CRI-f2/r2, Ghrhr-CRI-f4/r4, Ghrhr-CRI-f5/r5) were annealed  
497 and inserted into the pX335-U6-Chimeric\_BB-CBh-hSpCas9n(D10A) plasmid (Addgene  
498 #42335) (pX335-Ghrhr-1, 2, 4, 5, and pX335-Rosa-3, 4).

499 For POU1F1, CREB3L1, and CREB3L2 expression plasmids their open reading  
500 frames (ORF) were isolated by standard PCR from C57BL/6 pituitary gland template  
501 cDNA using sense (Pou1f1-vf1, Creb3l1-vf1, and Creb3l2-vf1) and antisense  
502 (Pou1f1-vr1, Creb3l1-vr1, and Creb3l2-vr1) primers, and inserted into the pcDNA4  
503 vector (Invitrogen).

504 For luciferase assay plasmids, the promoter regions of the *Ghrhr* (500 bp) and *Gh*  
505 (400 bp) genes were isolated from C57BL/6 mouse genomic DNA by standard PCR and  
506 inserted into the pGL4.10 vector (Promega).

507 For RNA probes to detect *GH1* and *Ghrhr* mRNAs by *in situ* hybridization, exon 3  
508 of the *GH1* gene (120 bp) and the *Ghrhr* ORF (1272 bp) were amplified by PCR using  
509 sense (GH1ex3-f1 and Ghrhr-vf1) and antisense (GH1ex3-r1 and Ghrhr-vr1) primers,  
510 with C57BL/6 pituitary gland cDNA as a template, and inserted into the pSP73 vector  
511 (Promega).

512

### 513 **Embryonic stem cell culture and electroporation**

514 KTPU8 feeder free ES cells, derived from F1 mice obtained by crossing C57BL/6  
515 and CBA strains, were seeded into dishes pretreated with 0.15% gelatin solution, and  
516 cultured in Glasgow minimum essential medium, 14% knockout serum replacement,  
517 and 100 IU/ml leukemia inhibitory factor. To establish *Gh*<sup>+/-</sup> ES cells, KTPU8 cells  
518 cultured in a 10 cm culture dish were electroporated (0.8 kV/3  $\mu$ F) with 20  $\mu$ g linearized  
519 KO vector containing a neomycin resistance (*neoR*) gene flanked by the 5' and 3' arms,  
520 and seeded into four 10 cm culture dishes. Culture medium containing 180  $\mu$ g/mL  
521 neomycin was exchanged daily. Nine days after electroporation, the surviving clones  
522 were picked and DNA from each clone was evaluated by Southern blotting (Fig EV1A  
523 and B).

524 To exchange the *neoR* gene for human *GH1* genes, the *Gh*<sup>+/-</sup> ES clones cultured  
525 in one 10 cm culture dish were electroporated (0.4 kV/125  $\mu$ F) with 20  $\mu$ g exchangeable  
526 vector and 10  $\mu$ g Cre expression vector. Culture medium containing 0.8  $\mu$ g/mL  
527 puromycin was exchanged daily, and the DNA samples of surviving clones were  
528 evaluated by Southern blotting (Fig EV1A and B).

529 To establish a mouse model in which the *LacZ* gene was knocked-in at the *Ghrhr*  
530 gene locus, ES cells derived from C57BL/6 mice were electroporated (0.4 kV/125  $\mu$ F)  
531 with 25  $\mu$ g plasmid containing the *LacZ* gene flanked by *Ghrhr* homology arms,  
532 pX335-Ghrhr-1 and pX335-Ghrhr-2 (15  $\mu$ g each) (Fig EV3A). For this process, we took  
533 advantage of D10A mutant Cas9, to avoid making double-strand breaks (Cong et al,  
534 2013; Jinek et al, 2012).

535

### 536 **Southern Blotting**

537 Southern blotting was conducted using DIG, according to the manufacturer's  
538 protocol. For *Gh* gene knockout, homologous recombination of the *neoR* gene was  
539 confirmed by Southern blotting using probes for sequences flanking the 5' and 3' arms,  
540 and the *neoR* gene (Fig EV1A and B). Substitution of the *GH1* gene for *neoR* was also  
541 evaluated by Southern blotting, using probes for the puromycin resistance gene (*PuroR*)  
542 (Fig EV1B). To evaluate knock-in of the *LacZ* gene at the *Ghrhr* gene locus, Southern  
543 blotting was performed, using probes for sequences flanking the 5' and 3' arms (Fig  
544 EV3A and B).

545

### 546 **RT-PCR and quantitative RT-PCR (qRT-PCR)**

547 Total RNA was extracted from mouse pituitaries using an RNeasy mini kit  
548 (Qiagen) and 250 ng converted to cDNA using Revertra Ace (TOYOBO, Osaka, Japan,  
549 FSQ-101). cDNA aliquots were used for RT-PCR and qRT-PCR.

550 For qRT-PCR, THUNDERBIRD SYBR qPCR Mix (TOYOBO, QPS-201) was used  
551 as Taq polymerase and reactions were performed using the SYBR method on an  
552 Applied Biosystems 7500 Real-Time PCR System (Applied Biosystems, Foster City,  
553 CA). In experiments using relative quantification, the relative concentrations of target  
554 mRNAs were calculated using a standard curve and normalized to  $\beta$ -actin expression.

555

### 556 **SDS-PAGE and immunoblotting**

557 SDS-PAGE and immunoblotting were carried out using polyacrylamide gels,  
558 polyvinylidene difluoride membranes, and ECL select detection reagent (Amersham,  
559 Buckinghamshire, England, RPN2235) according to standard procedures (Sambrook et  
560 al).

561

### 562 **Antibodies**

563 For immunoblotting assays, the following primary antibodies were used: 1)  
564 anti-GH rabbit polyclonal antibody (Dako, A0570) (dilution 1:3000); 2) anti-PERK rabbit



565 monoclonal antibody C33E10 (Cell Signaling Technology, 3192) (dilution 1:1000); 3)  
566 anti-caspase-3 rabbit monoclonal antibody 8G10 (Cell Signaling Technology, 9665)  
567 (dilution 1:1000); 4) anti-GRP78 rabbit monoclonal antibody EPR4041(2) (Abcam,  
568 ab108615) (dilution 1:500); 5) anti-GAPDH mouse monoclonal antibody 6C5 (Santa  
569 Cruz, sc-32233) (dilution 1:5000); 6) anti-LAMIN A/C rabbit polyclonal antibody (Cell  
570 Signaling Technology, 2032) (dilution 1:1000); 7) anti-POU1F1 mouse monoclonal  
571 antibody 2C11 (Abcam, ab10623) (dilution 1:1000); 8) anti-CREB3L1 mouse  
572 monoclonal antibody 44c7 (Merck Millipore, MABE1017) (dilution 1:1000); 9)  
573 anti-CREB3L2 rabbit polyclonal antibody (kindly provided by Prof. Imaizumi, Hiroshima  
574 University, Japan) (dilution 1:1000). Anti-rabbit immunoglobulin (IgG) (Dako, P0399)  
575 and anti-mouse immunoglobulin (Abcam, ab205719) (dilution 1:5000) secondary  
576 antibodies were used.

577 For immunohistochemistry, the following primary antibodies were used at a 1:100  
578 dilution: 1) anti-GH rabbit polyclonal antibody (Dako, A0570); 2) anti-GH mouse  
579 monoclonal antibody (Abcam, ab15317); 3) anti-CREB3L1 rabbit polyclonal antibody  
580 (Abcam, ab33051); and 4) anti-CREB3L2 rabbit polyclonal antibody (kindly provided by  
581 Prof. Imaizumi). Goat anti-rabbit IgG (Abcam, ab150079, and Dako, P0448) (dilution  
582 1:100) and M.O.M. biotinylated anti-mouse IgG reagent (VECTOR, MKB-2225)  
583 secondary antibodies were used. Fluorescein avidin DCS (VECTOR, A-2011) was used  
584 with the anti-mouse IgG reagent (MKB-2225).

585

### 586 **Luciferase assay**

587 BMT10 cells were seeded into 96-well plates at a density of 5000 cells/well. Next  
588 day, plasmids expressing POU1F1, CREB3L1-N, and CREB3L2-N or empty vector  
589 were mixed in various combinations and transfected using Lipofectamine 2000  
590 (Invitrogen). Forty-eight hours later, luciferase assay was performed using  
591 Dual-Luciferase Reporter Assay System (Promega).

592

### 593 **3-D structural analyses of GH proteins**

594 The 3-D structure of wild-type GH was obtained from the Protein Data Bank (PDB  
595 ID: 1AXI) and that of  $\Delta 3$  GH was analyzed using the homology model function of MOE  
596 software (Chemical Computing Group Inc.), as described previously (Nakamura et al,  
597 2017; Ogasawara et al, 2016). Hydrogen atoms were then added to each protein, using  
598 the protonate 3D function of MOE under ER pH conditions (Kim et al, 1998). These  
599 structures were then subjected to molecular mechanics (MM) calculations using MOE,  
600 with the AMBER99 force field, until the root mean square gradient was 0.01 kcal/mol/Å.

601 After heating for 250 ps to attain 310 K as the starting temperature, a 5000 ps  
602 production run of the molecular dynamic (MD) simulation was performed at 310 K, with  
603 NPT ensemble using NAMD software (Phillips et al, 2005).

604

#### 605 **Docking simulation analysis of dimeric GH molecules**

606 Docking simulations were performed using ZDOCK (Chen et al, 2003) with  
607 residues within 10 Å of cysteine residues (numbers 79, 191, 208, and 215) defined as  
608 docking sites in each protein (Ogasawara et al, 2016; Yasui et al, 2013). Two thousand  
609 docking runs were performed for each pair of GH molecules and docking poses were  
610 classified according to the distance between cysteine residues in the two GHs. The  
611 number and binding affinities of docking poses which could form dimers via  
612 intermolecular disulfide bonds (Grigorian et al, 2005) were analyzed.

613

#### 614 **Animals**

615 ICR and C57BL/6 mice were purchased from CLEA Japan, Inc. Egg zona  
616 pellucida from E2.5 ICR mouse embryos were removed and aggregated with KTPU8  
617 ES clones. The resulting blastocysts were transferred to the uteruses of ICR female  
618 mice mated with vasoligated male mice. F0 mice, with 100% chimerism, were crossed  
619 with C57BL/6 mice, to obtain N1 offspring.  $Gh^{wtGH1/wtGH1}$  and  $Gh^{wtGH1/\Delta 3GH1}$  mice were  
620 backcrossed to C57BL/6 mice for at least ten generations.

621

#### 622 **Genotyping**

623 To determine mouse genotypes, standard PCR reactions were performed using  
624 template DNA samples extracted from toe clips from 7-day-old mice (Fig EV1A and D).  
625 A reverse primer with the 3' end converted to thymine from cytosine at the first base of  
626 the intron 3 in the *GH1* gene (primer No. 4, completely matching the  $\Delta 3GH1$  allele) was  
627 used. PCR reactions to detect both *wtGH1* and  $\Delta 3GH1$  alleles used an annealing  
628 temperature of 60°C, with those to detect only the  $\Delta 3GH1$  allele using an annealing  
629 temperature of 66°C (Fig EV1D). The sequences of all primers used in this study are  
630 listed in Table 1.

631

#### 632 **Measurement of mouse body weight and length**

633 Mouse body weights were measured every week from 1 to 16 weeks of age. Body  
634 lengths (distances from nose to anus) were measured under anesthesia, induced using  
635 isoflurane, every 4 weeks from 4 to 16 weeks of age, using a ruler.

636

### 637 **Measurement of mouse serum IGF-1 concentration**

638 Blood samples were obtained from mouse orbital veins at 4 weeks of age, using a  
639 heparinized tube. Samples were centrifuged at 3000 rpm for 5 min, to collect serum  
640 samples collected. IGF-1 concentrations were evaluated using a Mouse/Rat IGF-1  
641 ELISA Kit (ALPCO, 22-IG1MS-E01).

642

### 643 **Hematoxylin and eosin (HE) staining, TUNEL assay, and Immunohistochemistry**

644 Pituitary glands were fixed in 4% paraformaldehyde (PFA) for 24 h at 15-25  
645 °C, dehydrated through increasing concentrations of ethanol, equilibrated with xylene,  
646 embedded in paraffin wax, and sectioned at 4 µm. Pituitary sections were stained with  
647 hematoxylin and eosin and examined by light microscopy. TUNEL assays were  
648 performed using an ApopTag Peroxidase In Situ Apoptosis Detection Kit (Millipore,  
649 S7100). Thymus sections were used as positive controls. For immunostaining of GH,  
650 pituitary sections were deparaffinized, rehydrated, and treated with 20 µg/ml proteinase  
651 K as an antigen retrieval step. Antibodies are described in the 'antibodies' section above.  
652 Staining was performed using diaminobenzidine (DAB) and hematoxylin.

653

### 654 **Immunofluorescence assay**

655 Pituitary glands were fixed in 4% PFA for 2 h at room temperature, dehydrated  
656 through increasing concentrations of sucrose, embedded in Optimal Cutting  
657 Temperature Compound, and sectioned at 6 µm. Frozen pituitary sections were  
658 subjected to immunofluorescence analysis.

659

### 660 ***In situ* hybridization**

661 Pituitary glands were fixed in 4% PFA for 48 h at room temperature.  
662 Deparaffinization, cell conditioning, prehybridization, and stringency washing were  
663 automated using a staining workstation (Ventana Discovery XT). RNA probes were  
664 synthesized by *in vitro* transcription, and labelled with digoxigenin (DIG), using a DIG  
665 RNA labeling kit (Roche, 11175025910). Probes for *wtGH1* and *Ghrhr* mRNAs were  
666 manually hybridized at 0.5 ng/ml, 65°C for 6 h, and 10 ng/ml, 68°C for 6 h, respectively.

667

### 668 **Transmission electron microscopy**

669 Pituitary glands from four-week-old mice were used for TEM observation, as  
670 described previously (Shibata et al, 2015). Briefly, tissues were dissected out and fixed  
671 in 2.5% glutaraldehyde in 0.1 M phosphate buffer (pH 7.4) for 24 h at 4°C. After 2 h  
672 post-fixation with 1% OsO<sub>4</sub> and dehydration through ethanol, then acetone with n-butyl

673 glycidyl ether (QY1) including a graded concentration of Epon with QY-1, they were  
674 embedded into 100% Epon. Following 72 h of polymerization in pure Epon, 70 nm  
675 ultrathin coronal pituitary gland sections were prepared on copper grids and stained with  
676 uranyl acetate and lead citrate for 10 min. Sections were observed under a TEM (JEOL  
677 JEM-1400 plus).

678

### 679 **X-gal staining of pituitary glands**

680 Pituitary glands were removed from four-week-old mice and fixed in 4% PFA for 1  
681 h on ice. Then, samples were permeabilized using rinse buffer (phosphate buffered  
682 saline (PBS) containing 2 mM MgCl<sub>2</sub>, 0.01% sodium deoxycholate, and 0.02% Nonidet  
683 P-40) for 2 h on ice, washed three times for 30 min in PBS, and stained in rinse buffer  
684 containing 5 mM potassium ferricyanide, 5 mM potassium ferrocyanide, and 1 mg/ml  
685 5-Bromo-4-Chloro-3-Indolyl-β-D-Galactoside (X-gal) overnight at 37°C. For E19.5  
686 embryo samples, heads were removed and fixed in 4% PFA for 30 min on ice. Then,  
687 pituitary glands were exposed by removing the skull bone and brain before  
688 permeabilization using rinse buffer.

689

### 690 **Dissociation of pituitary cells**

691 Anterior pituitary cells were dissociated, according to published methods, using  
692 0.5 % trypsin-EDTA (Oomizu et al, 1998).

693

### 694 **Soluble/insoluble fraction assay, cytoplasmic/nuclear fraction assay**

695 For soluble/insoluble fraction assays, anterior pituitary cells were dissociated as  
696 described above, and 0.5 x 10<sup>6</sup> cells seeded in DMEM with 10% FBS in a 24-well plate  
697 with 10 μM MG132 (Peptide Institute, Osaka, Japan), or DMSO, for 4 h. Detailed  
698 procedures have been described elsewhere (Ariyasu et al, 2013). To separate  
699 cytoplasmic and nuclear fractions, a NE-PER Nuclear and Cytoplasmic Reagent Kit  
700 (Thermo Fischer Scientific, 78833) was used.

701

### 702 **Statistics**

703 Data were analyzed by 2-tailed unpaired Student's *t* test for comparisons of two  
704 groups. For all bar graphs, means ± SD are plotted.

705

### 706 **Study approval**

707 The Animal Care Committee and Institutional Biosafety Committee of the  
708 Kumamoto University approved all mouse protocols. All experiments were performed in

709 accordance with the Declaration of Helsinki and were approved by the Kumamoto  
710 University Ethics Committee for Animal Experiments (authorization number in  
711 Kumamoto University: C23-262, C24-278).

712

### 713 **Acknowledgments**

714 This work was supported by JSPS KAKENHI Grant Numbers JP16H06276 and  
715 JP16H07081. The authors thank Mayumi Muta, Kumiko Murakami, Mai Nakahara, and  
716 Riki Furuhashi for assistance with embryo manipulation; Michiyo Nakata and Sayoko  
717 Fujimura for assistance with preparing paraffin-embedded and frozen pituitary samples;  
718 Hiderou Yoshida for giving important advice regarding ER stress-related experiments;  
719 Haruo Nogami for providing information about *Ghrhr* promoter activity; and Yukihiro  
720 Hasegawa for fruitful discussions about the manuscript and long-standing support.

721

### 722 **Author contributions**

723 DA and KA conceived the study. DA and KA designed the experiments. DA, EK,  
724 DH, YT, and SS performed the experiments and analyzed the data. DA, SS, and YT  
725 wrote the initial draft of the paper. TH, MS, KI, and KA critically revised the manuscript.  
726 All authors reviewed and edited the manuscript.

727

### 728 **Conflict of Interest**

729 The authors have declared that no conflict of interest exists.

730

### 731 **References**

732

733 Akinci A, Kanaka C, Eble A, Akar N, Vidinlisan S, Mullis PE (1992) Isolated growth  
734 hormone (GH) deficiency type IA associated with a 45-kilobase gene deletion within the  
735 human GH gene cluster. *The Journal of clinical endocrinology and metabolism* **75**:  
736 437-441

737

738 Araki K, Araki M, Yamamura K (2002) Site-directed integration of the cre gene mediated  
739 by Cre recombinase using a combination of mutant lox sites. *Nucleic acids research* **30**:  
740 e103

741

742 Ariyasu D, Yoshida H, Hasegawa Y (2017) Endoplasmic Reticulum (ER) Stress and  
743 Endocrine Disorders. *International journal of molecular sciences* **18**

744

- 745 Ariyasu D, Yoshida H, Yamada M, Hasegawa Y (2013) Endoplasmic reticulum stress  
746 and apoptosis contribute to the pathogenesis of dominantly inherited isolated GH  
747 deficiency due to GH1 gene splice site mutations. *Endocrinology* **154**: 3228-3239  
748
- 749 Binder G, Ranke MB (1995) Screening for growth hormone (GH) gene splice-site  
750 mutations in sporadic cases with severe isolated GH deficiency using ectopic transcript  
751 analysis. *The Journal of clinical endocrinology and metabolism* **80**: 1247-1252  
752
- 753 Chen R, Li L, Weng Z (2003) ZDOCK: an initial-stage protein-docking algorithm.  
754 *Proteins* **52**: 80-87  
755
- 756 Cogan JD, Phillips JA, 3rd, Schenkman SS, Milner RD, Sakati N (1994) Familial growth  
757 hormone deficiency: a model of dominant and recessive mutations affecting a  
758 monomeric protein. *The Journal of clinical endocrinology and metabolism* **79**:  
759 1261-1265  
760
- 761 Cong L, Ran FA, Cox D, Lin S, Barretto R, Habib N, Hsu PD, Wu X, Jiang W, Marraffini  
762 LA, Zhang F (2013) Multiplex genome engineering using CRISPR/Cas systems.  
763 *Science* **339**: 819-823  
764
- 765 Deladoey J, Stocker P, Mullis PE (2001) Autosomal dominant GH deficiency due to an  
766 Arg183His GH-1 gene mutation: clinical and molecular evidence of impaired regulated  
767 GH secretion. *The Journal of clinical endocrinology and metabolism* **86**: 3941-3947  
768
- 769 DenBoer LM, Hardy-Smith PW, Hogan MR, Cockram GP, Audas TE, Lu R (2005)  
770 Luman is capable of binding and activating transcription from the unfolded protein  
771 response element. *Biochemical and biophysical research communications* **331**:  
772 113-119  
773
- 774 Fonseca SG, Ishigaki S, Oslowski CM, Lu S, Lipson KL, Ghosh R, Hayashi E, Ishihara  
775 H, Oka Y, Permutt MA, Urano F (2010) Wolfram syndrome 1 gene negatively regulates  
776 ER stress signaling in rodent and human cells. *The Journal of clinical investigation* **120**:  
777 744-755  
778
- 779 Graves TK, Patel S, Dannies PS, Hinkle PM (2001) Misfolded growth hormone causes  
780 fragmentation of the Golgi apparatus and disrupts endoplasmic reticulum-to-Golgi traffic.

- 781 *Journal of cell science* **114**: 3685-3694  
782
- 783 Grigorian AL, Bustamante JJ, Hernandez P, Martinez AO, Haro LS (2005)  
784 Extraordinarily stable disulfide-linked homodimer of human growth hormone. *Protein*  
785 *science : a publication of the Protein Society* **14**: 902-913  
786
- 787 Hamid R, Phillips JA, 3rd, Holladay C, Cogan JD, Austin ED, Backeljauw PF, Travers  
788 SH, Patton JG (2009) A molecular basis for variation in clinical severity of isolated  
789 growth hormone deficiency type II. *The Journal of clinical endocrinology and*  
790 *metabolism* **94**: 4728-4734  
791
- 792 Harding HP, Zhang Y, Ron D (1999) Protein translation and folding are coupled by an  
793 endoplasmic-reticulum-resident kinase. *Nature* **397**: 271-274  
794
- 795 Hasegawa Y, Fujii K, Yamada M, Igarashi Y, Tachibana K, Tanaka T, Onigata K, Nishi  
796 Y, Kato S, Hasegawa T (2000) Identification of novel human GH-1 gene polymorphisms  
797 that are associated with growth hormone secretion and height. *The Journal of clinical*  
798 *endocrinology and metabolism* **85**: 1290-1295  
799
- 800 Hayashi M, Arima H, Ozaki N, Morishita Y, Hiroi M, Nagasaki H, Kinoshita N, Ueda M,  
801 Shiota A, Oiso Y (2009) Progressive polyuria without vasopressin neuron loss in a  
802 mouse model for familial neurohypophysial diabetes insipidus. *American journal of*  
803 *physiology Regulatory, integrative and comparative physiology* **296**: R1641-1649  
804
- 805 Hayashi Y, Yamamoto M, Ohmori S, Kamijo T, Ogawa M, Seo H (1999) Inhibition of  
806 growth hormone (GH) secretion by a mutant GH-I gene product in neuroendocrine cells  
807 containing secretory granules: an implication for isolated GH deficiency inherited in an  
808 autosomal dominant manner. *The Journal of clinical endocrinology and metabolism* **84**:  
809 2134-2139  
810
- 811 Iliev DI, Wittekindt NE, Ranke MB, Binder G (2005) Structural analysis of human growth  
812 hormone with respect to the dominant expression of growth hormone (GH) mutations in  
813 isolated GH deficiency type II. *Endocrinology* **146**: 1411-1417  
814
- 815 Imai Y, Soda M, Inoue H, Hattori N, Mizuno Y, Takahashi R (2001) An unfolded putative  
816 transmembrane polypeptide, which can lead to endoplasmic reticulum stress, is a

817 substrate of Parkin. *Cell* **105**: 891-902  
818  
819 Ito M, Yu RN, Jameson JL (1999) Mutant vasopressin precursors that cause autosomal  
820 dominant neurohypophyseal diabetes insipidus retain dimerization and impair the  
821 secretion of wild-type proteins. *The Journal of biological chemistry* **274**: 9029-9037  
822  
823 Jacobson EM, Li P, Leon-del-Rio A, Rosenfeld MG, Aggarwal AK (1997) Structure of  
824 Pit-1 POU domain bound to DNA as a dimer: unexpected arrangement and flexibility.  
825 *Genes Dev* **11**: 198-212  
826  
827 Jinek M, Chylinski K, Fonfara I, Hauer M, Doudna JA, Charpentier E (2012) A  
828 programmable dual-RNA-guided DNA endonuclease in adaptive bacterial immunity.  
829 *Science* **337**: 816-821  
830  
831 Kannenberg K, Wittekindt NE, Tippmann S, Wolburg H, Ranke MB, Binder G (2007)  
832 Mutant and misfolded human growth hormone is rapidly degraded through the  
833 proteasomal degradation pathway in a cellular model for isolated growth hormone  
834 deficiency type II. *Journal of neuroendocrinology* **19**: 882-890  
835  
836 Kim JH, Johannes L, Goud B, Antony C, Lingwood CA, Daneman R, Grinstein S (1998)  
837 Noninvasive measurement of the pH of the endoplasmic reticulum at rest and during  
838 calcium release. *Proceedings of the National Academy of Sciences of the United States*  
839 *of America* **95**: 2997-3002  
840  
841 Kondo S, Murakami T, Tatsumi K, Ogata M, Kanemoto S, Otori K, Iseki K, Wanaka A,  
842 Imaizumi K (2005) OASIS, a CREB/ATF-family member, modulates UPR signalling in  
843 astrocytes. *Nature cell biology* **7**: 186-194  
844  
845 Kondo S, Saito A, Asada R, Kanemoto S, Imaizumi K (2011) Physiological unfolded  
846 protein response regulated by OASIS family members, transmembrane bZIP  
847 transcription factors. *IUBMB life* **63**: 233-239  
848  
849 Kondo S, Saito A, Hino S, Murakami T, Ogata M, Kanemoto S, Nara S, Yamashita A,  
850 Yoshinaga K, Hara H, Imaizumi K (2007) BBF2H7, a novel transmembrane bZIP  
851 transcription factor, is a new type of endoplasmic reticulum stress transducer. *Molecular*  
852 *and cellular biology* **27**: 1716-1729



853

854 Lecomte CM, Renard A, Martial JA (1987) A new natural hGH variant--17.5  
855 kd--produced by alternative splicing. An additional consensus sequence which might  
856 play a role in branchpoint selection. *Nucleic acids research* **15**: 6331-6348

857

858 Lee MS, Wajnrajch MP, Kim SS, Plotnick LP, Wang J, Gertner JM, Leibel RL, Dannies  
859 PS (2000) Autosomal dominant growth hormone (GH) deficiency type II: the  
860 Del32-71-GH deletion mutant suppresses secretion of wild-type GH. *Endocrinology*  
861 **141**: 883-890

862

863 Lin SC, Lin CR, Gukovsky I, Lusic AJ, Sawchenko PE, Rosenfeld MG (1993) Molecular  
864 basis of the little mouse phenotype and implications for cell type-specific growth. *Nature*  
865 **364**: 208-213

866

867 Lochmatter D, Strom M, Eble A, Petkovic V, Fluck CE, Bidlingmaier M, Robinson IC,  
868 Mullis PE (2010) Isolated GH deficiency type II: knockdown of the harmful Delta3GH  
869 recovers wt-GH secretion in rat tumor pituitary cells. *Endocrinology* **151**: 4400-4409

870

871 McGuinness L, Magoulas C, Sesay AK, Mathers K, Carmignac D, Manneville JB,  
872 Christian H, Phillips JA, 3rd, Robinson IC (2003) Autosomal dominant growth hormone  
873 deficiency disrupts secretory vesicles in vitro and in vivo in transgenic mice.  
874 *Endocrinology* **144**: 720-731

875

876 Miletta MC, Fluck CE, Mullis PE (2017) Targeting GH-1 splicing as a novel  
877 pharmacological strategy for growth hormone deficiency type II. *Biochemical*  
878 *pharmacology* **124**: 1-9

879

880 Miletta MC, Petkovic V, Eble A, Fluck CE, Mullis PE (2016) Rescue of Isolated GH  
881 Deficiency Type II (IGHD II) via Pharmacologic Modulation of GH-1 Splicing.  
882 *Endocrinology* **157**: 3972-3982

883

884 Mullis PE, Deladoey J, Dannies PS (2002) Molecular and cellular basis of isolated  
885 dominant-negative growth hormone deficiency, IGHD type II: insights on the secretory  
886 pathway of peptide hormones. *Hormone research* **58**: 53-66

887

888 Murakami T, Hino S, Nishimura R, Yoneda T, Wanaka A, Imaizumi K (2011) Distinct

889 mechanisms are responsible for osteopenia and growth retardation in OASIS-deficient  
890 mice. *Bone* **48**: 514-523  
891  
892 Murakami T, Saito A, Hino S, Kondo S, Kanemoto S, Chihara K, Sekiya H, Tsumagari K,  
893 Ochiai K, Yoshinaga K, Saitoh M, Nishimura R, Yoneda T, Kou I, Furuichi T, Ikegawa S,  
894 Ikawa M, Okabe M, Wanaka A, Imaizumi K (2009) Signalling mediated by the  
895 endoplasmic reticulum stress transducer OASIS is involved in bone formation. *Nature*  
896 *cell biology* **11**: 1205-1211  
897  
898 Nagamori I, Yabuta N, Fujii T, Tanaka H, Yomogida K, Nishimune Y, Nojima H (2005)  
899 Tisp40, a spermatid specific bZip transcription factor, functions by binding to the  
900 unfolded protein response element via the Rip pathway. *Genes to cells : devoted to*  
901 *molecular & cellular mechanisms* **10**: 575-594  
902  
903 Nakamura Y, Sugano A, Ohta M, Takaoka Y (2017) Docking analysis and the possibility  
904 of prediction efficacy for an anti-IL-13 biopharmaceutical treatment with tralokinumab  
905 and lebrikizumab for bronchial asthma. *PloS one* **12**: e0188407  
906  
907 Ogasawara M, Nakamura Y, Morikawa N, Nitanei H, Moriguchi S, Chiba R, Saito H,  
908 Ohta M, Tanita T, Sugai T, Maeyama K, Yamauchi K, Takaoka Y (2016) Analysis of a  
909 single-codon E746 deletion in exon 19 of the epidermal growth factor receptor. *Cancer*  
910 *chemotherapy and pharmacology* **77**: 1019-1029  
911  
912 Omori Y, Imai J, Watanabe M, Komatsu T, Suzuki Y, Kataoka K, Watanabe S, Tanigami  
913 A, Sugano S (2001) CREB-H: a novel mammalian transcription factor belonging to the  
914 CREB/ATF family and functioning via the box-B element with a liver-specific expression.  
915 *Nucleic acids research* **29**: 2154-2162  
916  
917 Oomizu S, Takeuchi S, Takahashi S (1998) Stimulatory effect of insulin-like growth  
918 factor I on proliferation of mouse pituitary cells in serum-free culture. *The Journal of*  
919 *endocrinology* **157**: 53-62  
920  
921 Oyadomari S, Koizumi A, Takeda K, Gotoh T, Akira S, Araki E, Mori M (2002) Targeted  
922 disruption of the Chop gene delays endoplasmic reticulum stress-mediated diabetes.  
923 *The Journal of clinical investigation* **109**: 525-532  
924

- 925 Petkovic V, Godi M, Lochmatter D, Eble A, Fluck CE, Robinson IC, Mullis PE (2010)  
926 Growth hormone (GH)-releasing hormone increases the expression of the  
927 dominant-negative GH isoform in cases of isolated GH deficiency due to GH splice-site  
928 mutations. *Endocrinology* **151**: 2650-2658  
929
- 930 Phillips JC, Braun R, Wang W, Gumbart J, Tajkhorshid E, Villa E, Chipot C, Skeel RD,  
931 Kale L, Schulten K (2005) Scalable molecular dynamics with NAMD. *Journal of*  
932 *computational chemistry* **26**: 1781-1802  
933
- 934 Ryther RC, Flynt AS, Harris BD, Phillips JA, 3rd, Patton JG (2004) GH1 splicing is  
935 regulated by multiple enhancers whose mutation produces a dominant-negative GH  
936 isoform that can be degraded by allele-specific small interfering RNA (siRNA).  
937 *Endocrinology* **145**: 2988-2996  
938
- 939 Saito A, Hino S, Murakami T, Kanemoto S, Kondo S, Saitoh M, Nishimura R, Yoneda T,  
940 Furuichi T, Ikegawa S, Ikawa M, Okabe M, Imaizumi K (2009) Regulation of  
941 endoplasmic reticulum stress response by a BBF2H7-mediated Sec23a pathway is  
942 essential for chondrogenesis. *Nature cell biology* **11**: 1197-1204  
943
- 944 Saito A, Kanemoto S, Kawasaki N, Asada R, Iwamoto H, Oki M, Miyagi H, Izumi S,  
945 Sanosaka T, Nakashima K, Imaizumi K (2012) Unfolded protein response, activated by  
946 OASIS family transcription factors, promotes astrocyte differentiation. *Nature*  
947 *communications* **3**: 967  
948
- 949 Salemi S, Yousefi S, Eble A, Deladoey J, Mullis PE (2006) Impact of del32-71-GH (exon  
950 3 skipped GH) on intracellular GH distribution, secretion and cell viability: a quantitative  
951 confocal microscopy analysis. *Hormone research* **65**: 132-141  
952
- 953 Salemi S, Yousefi S, Lochmatter D, Eble A, Deladoey J, Robinson IC, Simon HU, Mullis  
954 PE (2007) Isolated autosomal dominant growth hormone deficiency: stimulating mutant  
955 GH-1 gene expression drives GH-1 splice-site selection, cell proliferation, and apoptosis.  
956 *Endocrinology* **148**: 45-53  
957
- 958 Sambrook J, Eritsch E, Maniatis T *Molecular Cloning: A Laboratory Manual*, New  
959 York: Cold Spring Harbor Laboratory Press.  
960

- 961 Shaheen A (2018) Effect of the unfolded protein response on ER protein export: a  
962 potential new mechanism to relieve ER stress. *Cell stress & chaperones* **23**: 797-806  
963
- 964 Shibata S, Murota Y, Nishimoto Y, Yoshimura M, Nagai T, Okano H, Siomi MC (2015)  
965 Immuno-Electron Microscopy and Electron Microscopic In Situ Hybridization for  
966 Visualizing piRNA Biogenesis Bodies in Drosophila Ovaries. *Methods Mol Biol* **1328**:  
967 163-178  
968
- 969 Vecchi C, Montosi G, Zhang K, Lamberti I, Duncan SA, Kaufman RJ, Pietrangelo A  
970 (2009) ER stress controls iron metabolism through induction of hepcidin. *Science* **325**:  
971 877-880  
972
- 973 Ward CL, Omura S, Kopito RR (1995) Degradation of CFTR by the  
974 ubiquitin-proteasome pathway. *Cell* **83**: 121-127  
975
- 976 Yasui N, Takaoka Y, Nishio H, Nurputra DK, Sekiguchi K, Hamaguchi H, Kowa H,  
977 Maeda E, Sugano A, Miura K, Sakaeda T, Kanda F, Toda T (2013) Molecular pathology  
978 of Sandhoff disease with p.Arg505Gln in HEXB: application of simulation analysis.  
979 *Journal of human genetics* **58**: 611-617  
980
- 981 Yoshida H (2007) ER stress and diseases. *The FEBS journal* **274**: 630-658  
982
- 983 Yoshida H, Matsui T, Yamamoto A, Okada T, Mori K (2001) XBP1 mRNA is induced by  
984 ATF6 and spliced by IRE1 in response to ER stress to produce a highly active  
985 transcription factor. *Cell* **107**: 881-891  
986
- 987 Zhang K, Shen X, Wu J, Sakaki K, Saunders T, Rutkowski DT, Back SH, Kaufman RJ  
988 (2006) Endoplasmic reticulum stress activates cleavage of CREBH to induce a systemic  
989 inflammatory response. *Cell* **124**: 587-599  
990

## 991 **Figure Legends**

- 992
- 993 Figure 1
- 994 *Gh*<sup>wtGH1/Δ3GH1</sup> mice exhibit a Δ3 GH-mediated dominant negative phenotype.
- 995 (A) Schematic representations of wild-type and genetically modified alleles. Vertical  
996 long open and closed rectangles represent the 5 exons of the endogenous *Gh* gene and

997 the exchanged human *GH1* gene, respectively. Orange and purple rectangles,  
998 untranslated regions of the *Gh* gene. Red closed circle, c.291+1 g>a mutation. hACp,  
999 human actin promoter; neoR, neomycin resistance gene; pPGK, phosphoglycerate  
1000 kinase promoter; PuroR, puromycin resistance gene; pA, polyadenylation signal.

1001 (B, C) Growth curves of model mice. (B) Body weight (BW) and (C) body length (BL)  
1002 were measured every week and every 4 weeks, respectively, up to 16 weeks of age.  
1003 Asterisks indicate that data from *Gh*<sup>wtGH1/Δ3GH1</sup> mice are significantly different to those  
1004 from *Gh*<sup>wtGH1/wtGH1</sup> mice. Means calculated from the indicated numbers of model mice  
1005 (bottom right in (B)) are shown. Error bars represent the standard deviation (SD) of  
1006 values in *Gh*<sup>wtGH1/wtGH1</sup> and *Gh*<sup>wtGH1/Δ3GH1</sup> mice. \*p<0.01, \*\*p<0.005.

1007 (D) Serum IGF-1 values in 4-week-old model mice. Mean and SD values from six mice  
1008 with each genotype are shown. \*\*p<0.005.

1009 (E) Photograph of male *Gh*<sup>wtGH1/wtGH1</sup>, *Gh*<sup>wtGH1/-</sup>, *Gh*<sup>wtGH1/Δ3GH1</sup>, and *Gh*<sup>-/-</sup> mice at 8 weeks  
1010 old.

1011

1012 Figure 2

1013 Evaluation of wild-type and Δ3 GH expression in *Gh*<sup>wtGH1/wtGH1</sup> and *Gh*<sup>wtGH1/Δ3GH1</sup> pituitary  
1014 samples.

1015 (A) Immunoblotting using anti-GH antibody. This antibody recognizes Δ3 GH; however,  
1016 the 17.5 kDa signals were too faint to be detected in *Gh*<sup>wtGH1/Δ3GH1</sup> pituitary glands. An  
1017 image obtained by long exposure is shown on the right.

1018 (B) Evaluation of wild-type GH expression in (A) by densitometry. \*p<0.05.

1019 (C) Results of immunohistochemistry using the same antibody used in (A). Scale bars,  
1020 100 μM.

1021 (D) Abundance of *wtGH1* and *Δ3GH1* mRNAs, evaluated by RT-PCR using a sense  
1022 primer in exon 1 and an antisense primer in exon 5.

1023 (E) Evaluation of *wtGH1* mRNA abundance by qRT-PCR, using a sense primer in exon  
1024 3 and an antisense primer spanning exons 3 and 4. Data presented are mean and SD  
1025 values from three independent samples, with relative abundance calculated by  
1026 normalization to *β-actin* expression. \*\*\*p<0.005.

1027 (F) Results of qRT-PCR to evaluate the abundance of *wtGH1* mRNA using pituitary  
1028 samples from *Gh*<sup>wtGH1/wtGH1</sup> and *Gh*<sup>wtGH1/Δ3GH1</sup> mice at E19.5, and 1, 2, 3, and 4 weeks of  
1029 age. \*\*p<0.01, \*\*\*p<0.005.

1030 (G) *In situ* hybridization of pituitary gland samples from E19.5 and 4-week-old mice,  
1031 using an antisense probe complementary to *GH1* exon 3 mRNA. Scale bars, 100 μM.

1032

1033 Figure 3

1034 Histological evaluation of pituitary glands from  $Gh^{wtGH1/wtGH1}$  and  $Gh^{wtGH1/\Delta3GH1}$  mice.

1035 (A) Stereomicroscope images of pituitary glands from 4-week-old  $Gh^{+/+}$ ,  $Gh^{wtGH1/wtGH1}$ ,  
1036  $Gh^{wtGH1/-}$ ,  $Gh^{wtGH1/\Delta3GH1}$ , and  $Gh^{-/-}$  mice. Scale bars, 2 mm.

1037 (B) HE (scale bars, 50  $\mu$ M) and TUNEL staining (scale bars, 100  $\mu$ M) of pituitary glands  
1038 from 4-week-old  $Gh^{wtGH1/wtGH1}$  and  $Gh^{wtGH1/\Delta3GH1}$  mice.

1039 (C, D) TEM images of pituitary glands from 4-week-old (C)  $Gh^{wtGH1/wtGH1}$  and  
1040  $Gh^{wtGH1/\Delta3GH1}$ , and (D)  $Gh^{-/-}$  and  $Gh^{\Delta3GH1/-}$ , mice. Marked enlargement of the rough ER  
1041 (arrow) and cytosolic protein aggregates (arrowhead) were observed in  $Gh^{wtGH1/\Delta3GH1}$   
1042 and  $Gh^{\Delta3GH1/-}$  somatotroph. Scale bars, 10  $\mu$ M (low power field) and 2  $\mu$ M (high power  
1043 field).

1044 (E) Magnified view of the open square in (C). The rough ER membrane is connected to  
1045 the protein aggregates (arrowhead). Scale bar, 1  $\mu$ M.

1046 (F) Evaluation of cellular localization of  $\Delta3GH$ -myc by immunofluorescence, using  
1047 antibodies against the myc-tag ( $\Delta3GH$ -myc), KDEL (ER marker), and GM130 (Golgi  
1048 marker).

1049

1050 Figure 4

1051  $\Delta3$  GH activates three major ER stress response pathways.

1052 (A) Evaluation of phosphorylation of PERK, expression of BiP, and activation of  
1053 caspase-3 by immunoblotting using pituitary glands from 2 and 4-week-old  $Gh^{wtGH1/wtGH1}$   
1054 and  $Gh^{wtGH1/\Delta3GH1}$  mice.

1055 (B) qRT-PCR evaluation of the abundance of *BiP* mRNA in pituitary glands from 2 and  
1056 4-week-old  $Gh^{wtGH1/wtGH1}$  and  $Gh^{wtGH1/\Delta3GH1}$  mice. \*\* $p < 0.01$ .

1057 (C) RT-PCR evaluation of *Xbp1* mRNA splicing. Primers surrounding the region spliced  
1058 out by IRE1 were used. PCR products of 140 and 114 bp, represent unspliced (*Xbp1*(u))  
1059 and spliced (*Xbp1*(s)) *Xbp1*, respectively. M, PCR molecular weight marker.

1060 (D) Evaluation of the ratio of *Xbp1*(s) to *Xbp1*(u) by densitometry. \* $p < 0.05$ , \*\* $p < 0.01$ ,  
1061 \*\*\* $p < 0.005$ .

1062

1063 Figure 5

1064  $\Delta3$  GH decreases *Ghrhr* gene promoter activity.

1065 (A) Evaluation of *Ghrhr* mRNA abundance by qRT-PCR using samples from  
1066  $Gh^{wtGH1/wtGH1}$ ,  $Gh^{wtGH1/\Delta3GH1}$ ,  $Gh^{-/-}$ , and  $Gh^{\Delta3GH1/-}$  mice at 4 weeks old. Data presented are  
1067 mean and SD values from three independent samples, with relative abundance  
1068 calculated by normalization to  $\beta$ -actin expression. \*\*\* $p < 0.005$ .

1069 (B) *In situ* hybridization evaluation of *Ghrhr* mRNA expression in pituitary glands from  
 1070 E19.5 and 4-week-old  $Gh^{wtGH1/wtGH1}$ ,  $Gh^{wtGH1/\Delta3GH1}$ ,  $Gh^{-/-}$ , and  $Gh^{\Delta3GH1/-}$  mice. Scale bars,  
 1071 100  $\mu$ M.

1072 (C) Growth curves of male  $Gh^{-/-}$  and  $Gh^{\Delta3GH1/-}$  mice.

1073 (D) Results of X-gal staining of pituitary glands from 4-week-old and E19.5  $Ghrhr^{+/LacZ}$ ,  
 1074  $Gh^{wtGH1/wtGH1}$  and  $Ghrhr^{+/LacZ}$ ;  $Gh^{wtGH1/\Delta3GH1}$  mice. Arrows indicate pituitary glands. Scale  
 1075 bars, 2 mm.

1076

1077 Figure 6

1078 Levels of nuclear CREB3L2 are decreased in pituitary glands from  $Gh^{wtGH1/\Delta3GH1}$  mice.

1079 (A) Evaluation of Creb3 family member expression in 4-week-old whole pituitary glands  
 1080 by RT-PCR.

1081 (B) Evaluation of *Creb3l1* and *Creb3l2* gene expression in pituitary glands from  
 1082 4-week-old  $Gh^{wtGH1/wtGH1}$  and  $Gh^{wtGH1/\Delta3GH1}$  mice by qRT-PCR. \* $p < 0.05$ .

1083 (C) Evaluation of cytoplasmic (Cy) and nuclear (N) expression levels of CREB3L1 and  
 1084 CREB3L2 by immunoblotting. Anterior pituitary cells from four-week-old  $Gh^{wtGH1/wtGH1}$   
 1085 and  $Gh^{wtGH1/\Delta3GH1}$  mice were dissociated and separated into Cy and N fractions. GAPDH  
 1086 and LAMIN A/C were used as positive controls for Cy and N fractions, respectively.

1087 (D) Reporter assay to evaluate expression driven by the *Ghrhr* (500 bp) and *Gh* (400  
 1088 bp) promoters using vectors expressing POU1F1, CREB3L1-N, and CREB3L2-N.

1089 (E, F) Evaluation of CREB3L2 protein levels in pituitary glands from E19.5 mouse  
 1090 embryos by immunoblotting. \*\* $p < 0.01$ .

1091 (G) Evaluation of the abundance of *Sec23a* mRNA in pituitary glands from E19.5 mouse  
 1092 embryos by qRT-PCR. \* $p < 0.05$ .

1093

1094 Figure 7

1095 A schematic representation of  $\Delta 3$  GH-mediated dominant negative effects in IGHD2  
 1096 model mice.

1097

## 1098 Tables

1099

1100 Table 1

|             | wild type GH - wild type GH | wild type GH- $\Delta 3$ GH |
|-------------|-----------------------------|-----------------------------|
| ZDOCK score | 150.6 $\pm$ 16.58 (n=234)   | 146.21 $\pm$ 19.18 (n=938)* |

1101 Results of docking simulation of wild-type and  $\Delta 3$  GH. Higher ZDOCK score indicates  
1102 more stable binding affinity. Numbers indicate times of the docking runs. \*\*\* $p < 0.001$ .

1103

## 1104 **Expanded View Figure Legends**

1105

1106 Expanded View Figure 1

1107 Establishment of IGHD2 model mice using the gene exchange system.

1108 (A) Schematic representation of the gene exchange system. Vertical long open and  
1109 grey rectangles represent the open reading frames of the endogenous *Gh* and  
1110 exchanged human *GH1* genes, respectively. Orange and purple rectangles represent  
1111 untranslated regions of the *Gh* gene. Black bold lines represent homology arms. Red  
1112 and blue bold lines represent probes used for Southern blotting to detect homologous  
1113 recombination of the neoR gene and exchange of the *GH1* gene. Red and blue vertical  
1114 lines represent EcoRI and KpnI recognition sites, respectively. Green arrows numbered  
1115 from 1 to 4, genotyping primers. DT-A, diphtheria toxin A.

1116 (B) Results of Southern blotting using probes indicated in (A).

1117 (C) Intact and mutant loxP sequences used in this study; red letters indicate mutant  
1118 sequences.

1119 (D) Typical results of PCR genotyping using primers 1 to 4. Signals detecting *Gh*<sup>+</sup>, *Gh*<sup>-</sup>,  
1120 and *Gh*<sup>wtGH1</sup> or *Gh* <sup>$\Delta 3GH1$</sup>  are shown. M: PCR molecular weight marker.

1121 (E) Growth curves of male *Gh*<sup>+/ $\Delta 3GH1$</sup>  and *Gh*<sup>mGh/ $\Delta 3GH1$</sup>  mice.

1122 (F) qRT-PCR evaluating the abundance of mRNA transcribed from the endogenous and  
1123 exchanged *Gh* alleles in pituitary glands from 4-week-old mice.

1124

1125 Expanded View Figure 2

1126 (A) GH4C1 cells were transfected with *wtGH1* and/or  *$\Delta 3GH1$*  cDNA constructs in the  
1127 presence or absence of treatment with the proteasome inhibitor, MG132. Cell lysate  
1128 samples were subjected to immunoblotting analysis using anti-GH antibody. Upper  
1129 numbers indicate the quantities of transfected plasmid DNA, encoding either *wtGH1* or  
1130  *$\Delta 3GH1$* , cDNA. Note that  $\Delta 3$  GH is degraded by the proteasome and the anti-GH  
1131 antibody used in this study has comparable affinities for both wild-type and  $\Delta 3$  GH  
1132 proteins.

1133 (B) Evaluation of the distribution of wild-type and  $\Delta 3$  GH by soluble/insoluble fraction  
1134 assay. Four-week-old anterior pituitary cells from *Gh*<sup>wtGH1/ $\Delta 3GH1$</sup>  mice were dissociated,  
1135 separated into soluble (S) and insoluble (I) fractions, and subjected to immunoblotting in  
1136 the presence or absence of MG132 treatment (10  $\mu$ M, 4 h). GAPDH was used as a



1137 positive control for the soluble fractions.

1138 (C) Photograph of male  $Gh^{-/-}$ , and  $Gh^{\Delta 3GH1/-}$  mice at 8 weeks old.

1139

1140 Expanded View Figure 3

1141 (A) A strategy for establishing *LacZ* knocked-in model mice, using the CRISPR/Cas9  
1142 system. The *LacZ* gene was inserted into exon 1 of the *Ghrhr* gene by homologous  
1143 recombination. Blue and orange bars, 5' and 3' homology arm CRISPR oligonucleotides,  
1144 respectively. Purple bar, probe used for Southern blotting. NLS, nuclear-localization  
1145 signal; B, BglIII recognition site.

1146 (B) Results of Southern blotting using the probe indicated in (A).

1147 (C) Evaluation of cytoplasmic and nuclear POU1F1 expression levels by  
1148 immunoblotting. Anterior pituitary cells from four-week-old  $Gh^{wtGH1/wtGH1}$  and  
1149  $Gh^{wtGH1/\Delta 3GH1}$  mice were dissociated, separated into cytoplasmic (Cy) and nuclear (N)  
1150 fractions, and subjected to immunoblotting analysis. GAPDH and LAMIN A/C were used  
1151 as positive controls for Cy and N fractions, respectively.

1152 (D) Evaluation of wild-type GH, CREB3L1, and CREB3L2 expression in pituitary glands  
1153 from 4-week-old  $Gh^{wtGH1/wtGH1}$  and  $Gh^{wtGH1/\Delta 3GH1}$  mice by immunofluorescence analysis.

1154

Figure 1

bioRxiv preprint doi: <https://doi.org/10.1101/545384>; this version posted February 8, 2019. The copyright holder for this preprint (which was not certified by peer review) is the author/funder, who has granted bioRxiv a license to display the preprint in perpetuity. It is made available under aCC-BY-ND 4.0 International license.

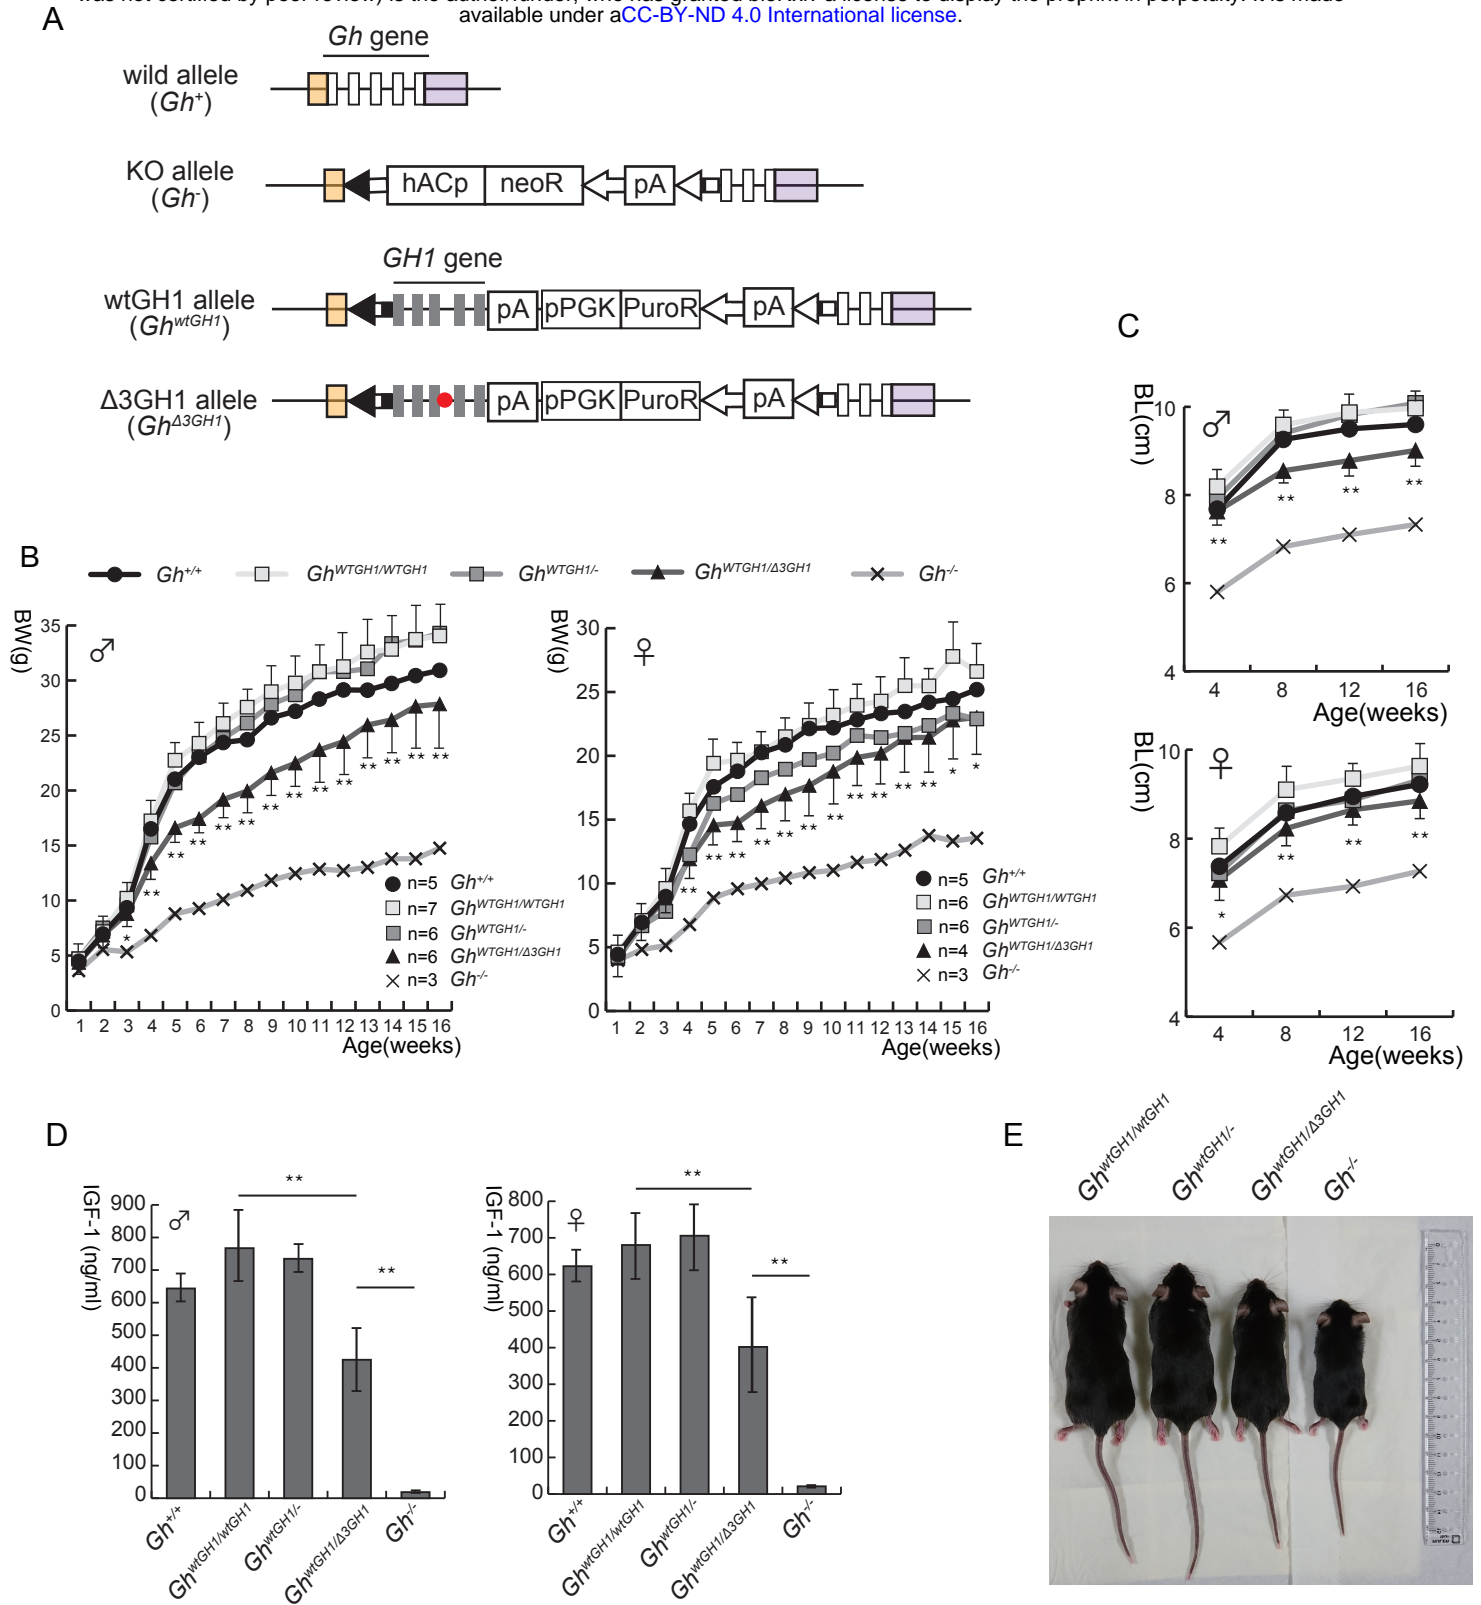

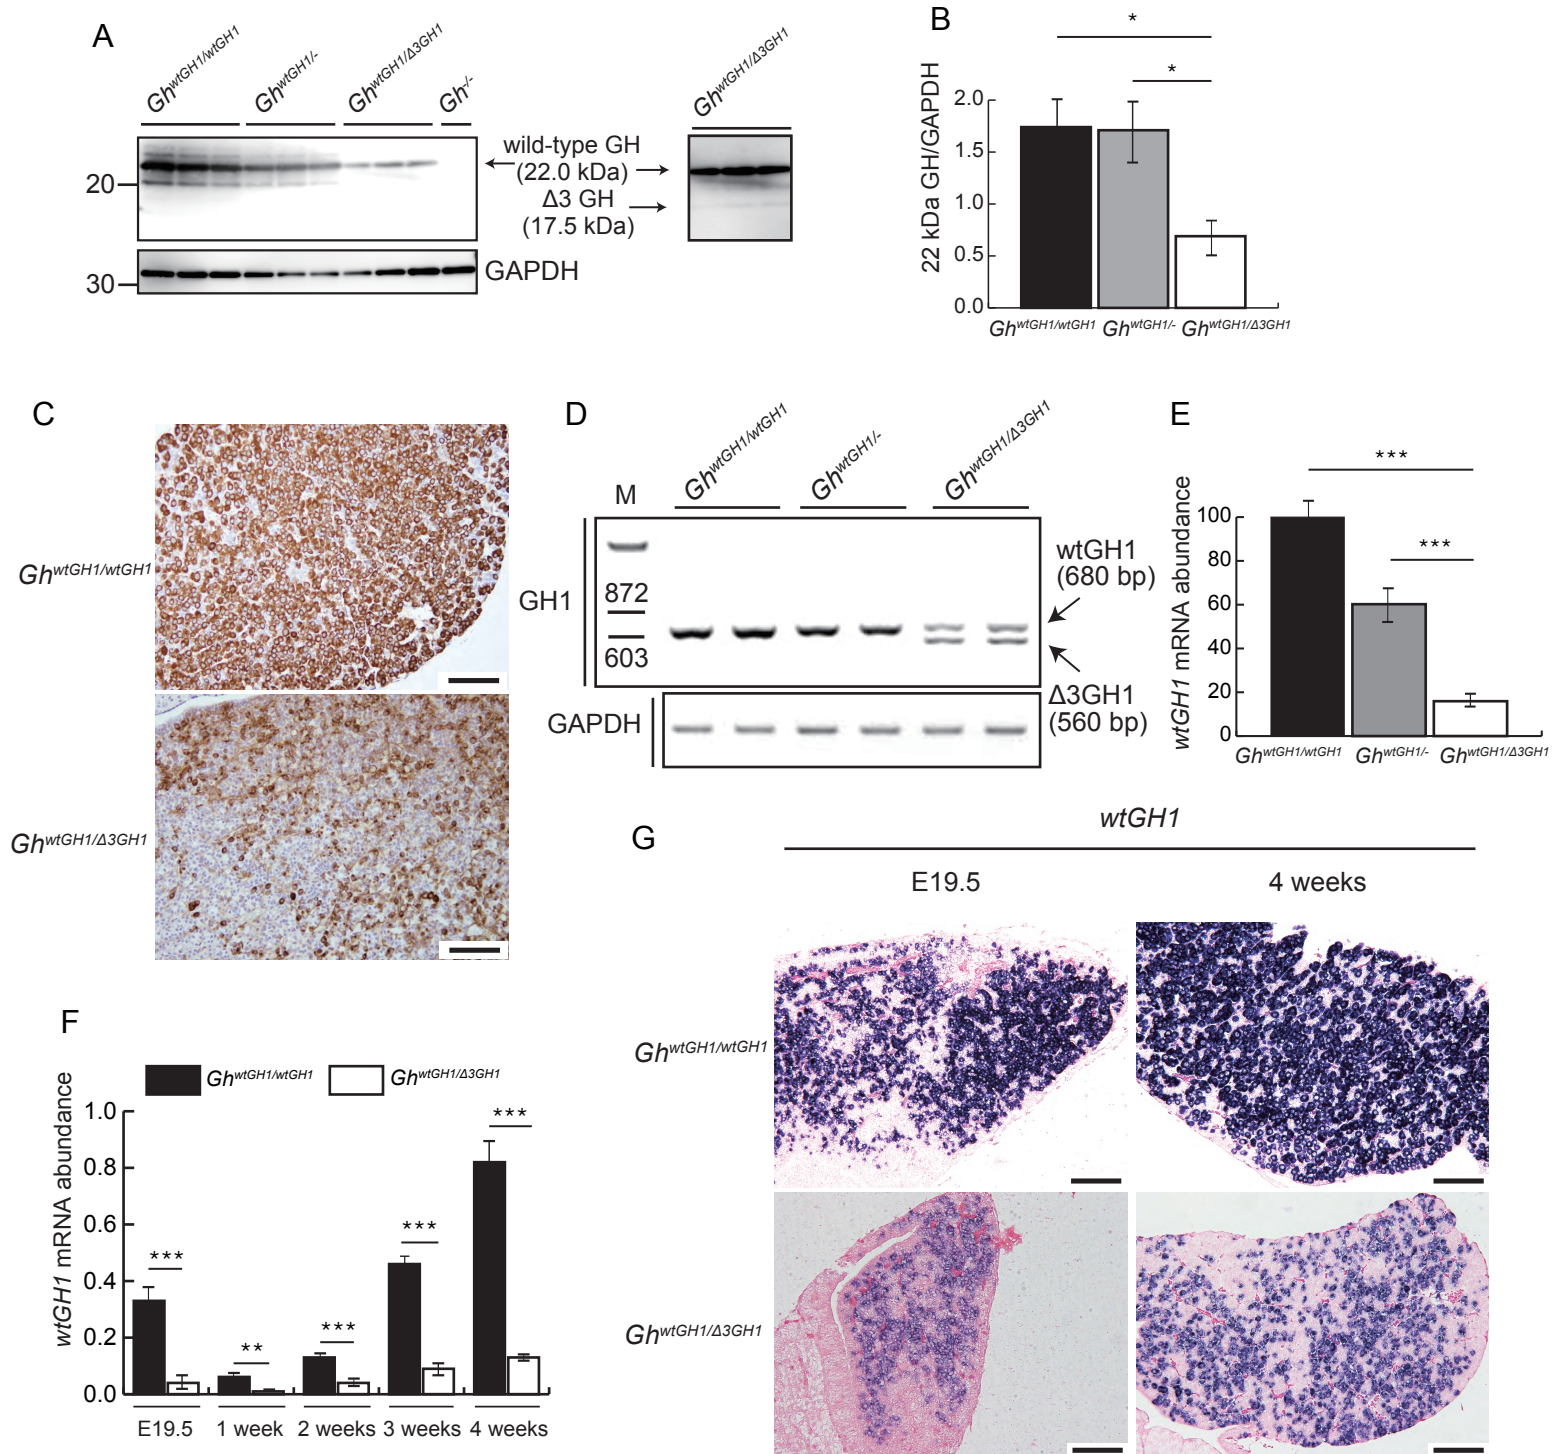

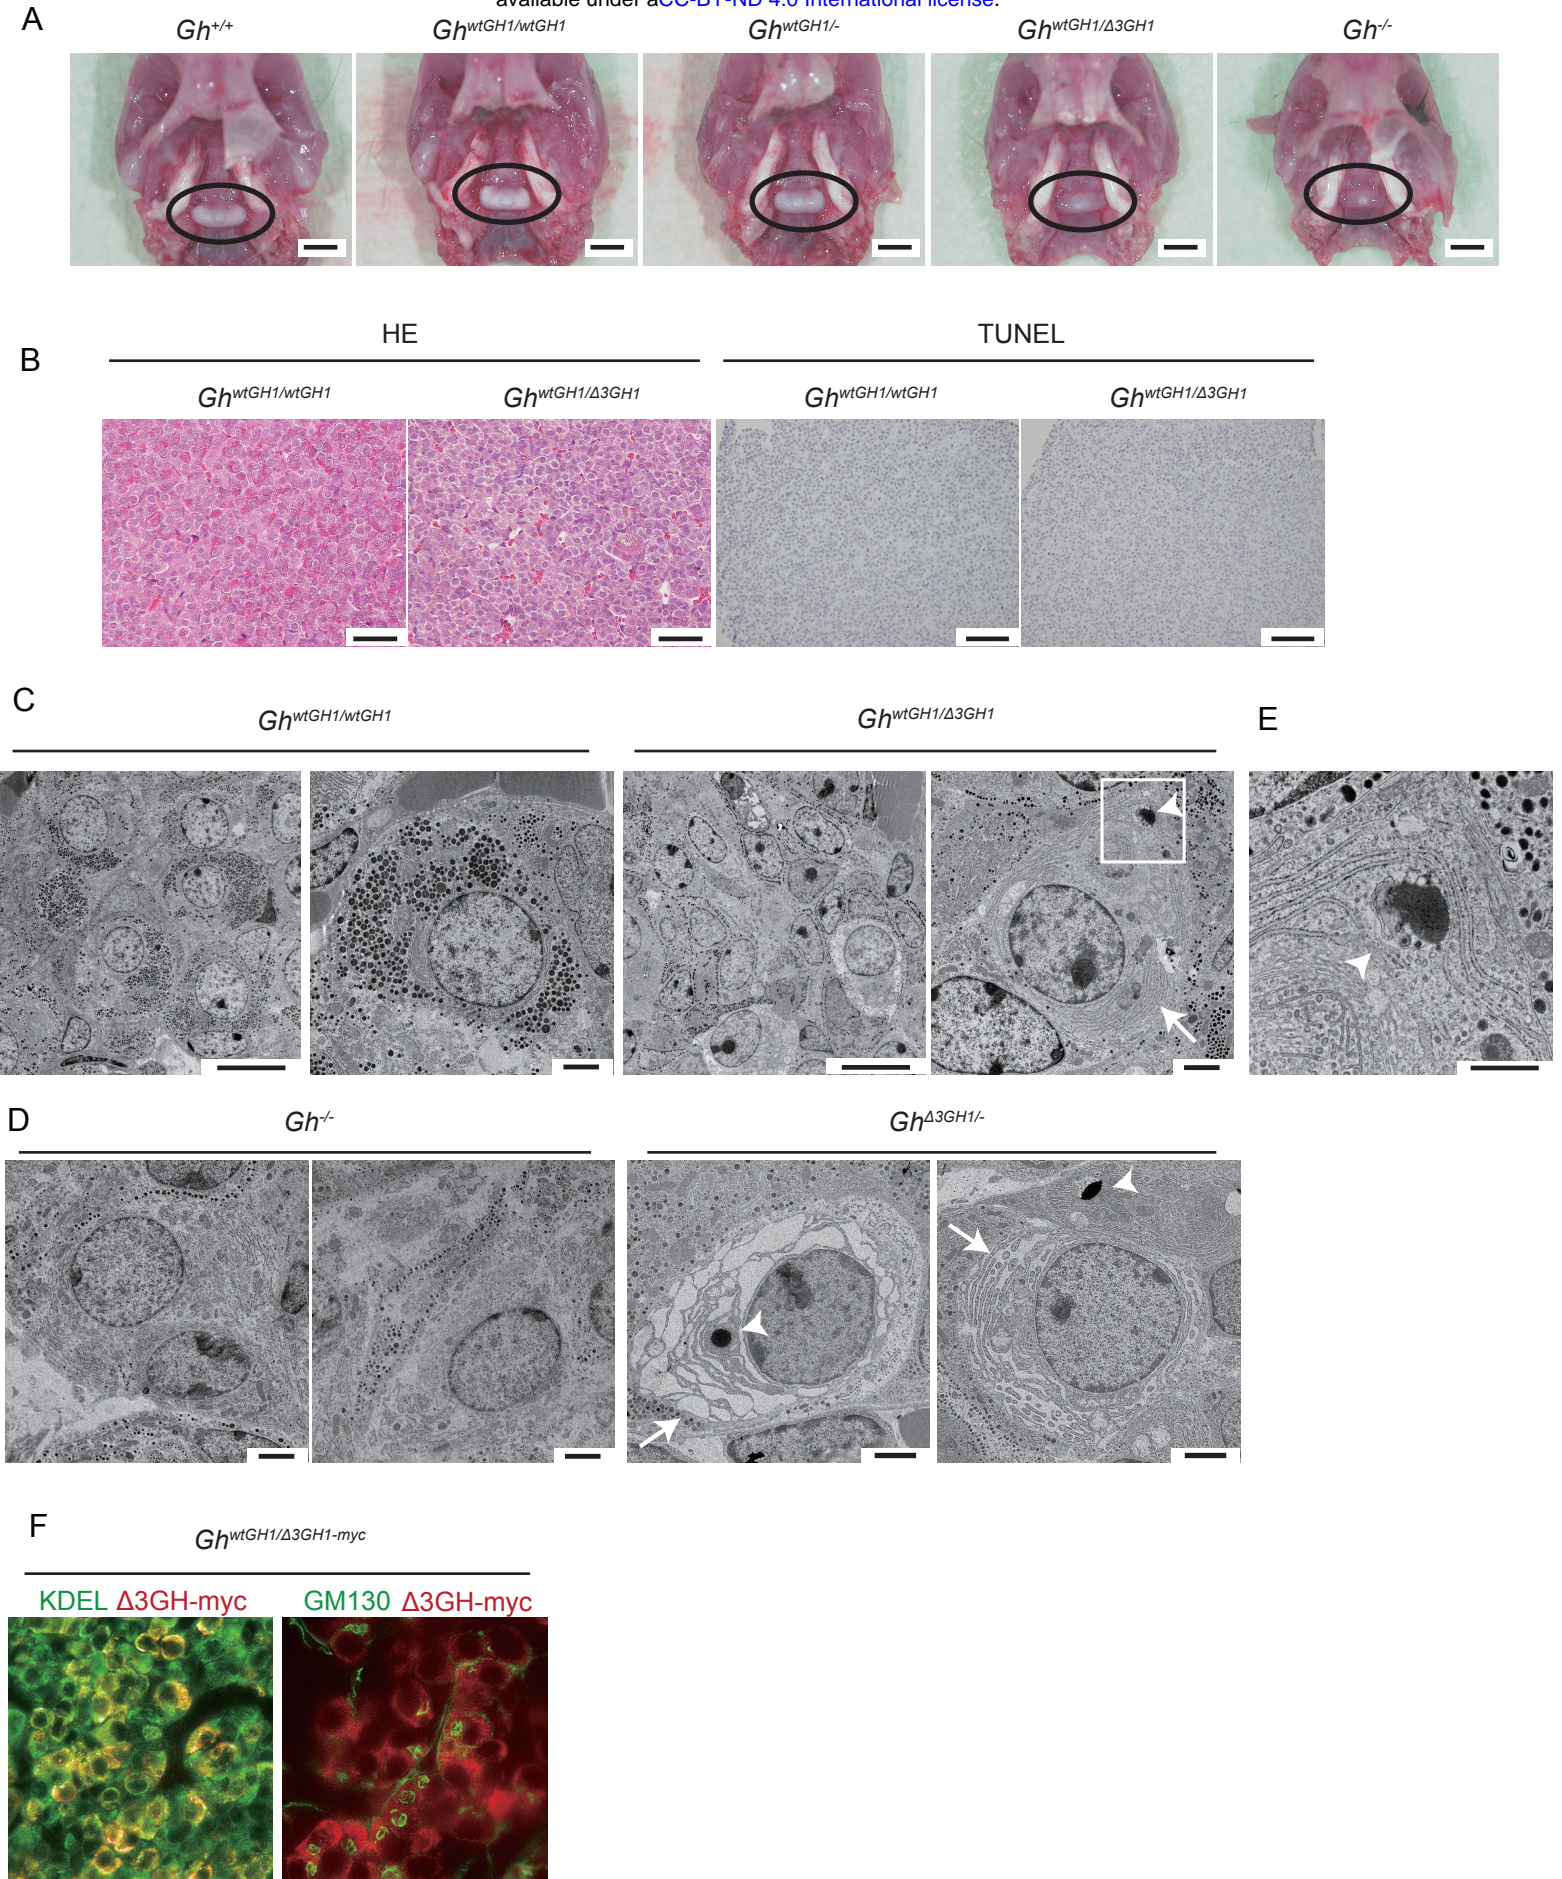

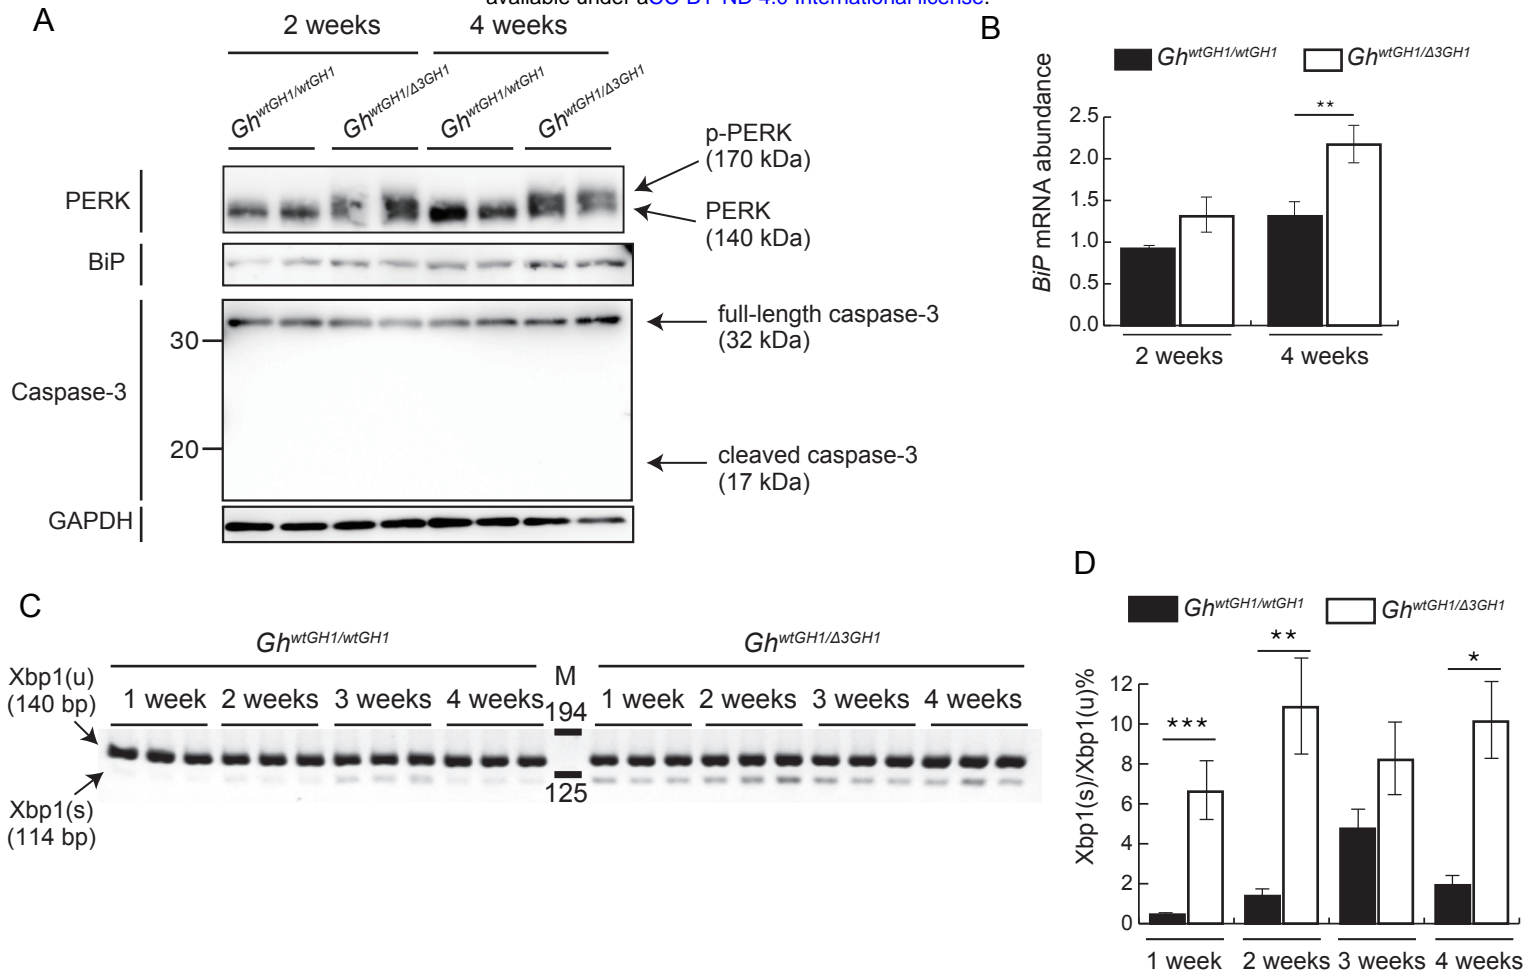

Figure 5

bioRxiv preprint doi: <https://doi.org/10.1101/545384>; this version posted February 8, 2019. The copyright holder for this preprint (which was not certified by peer review) is the author/funder, who has granted bioRxiv a license to display the preprint in perpetuity. It is made available under aCC-BY-ND 4.0 International license.

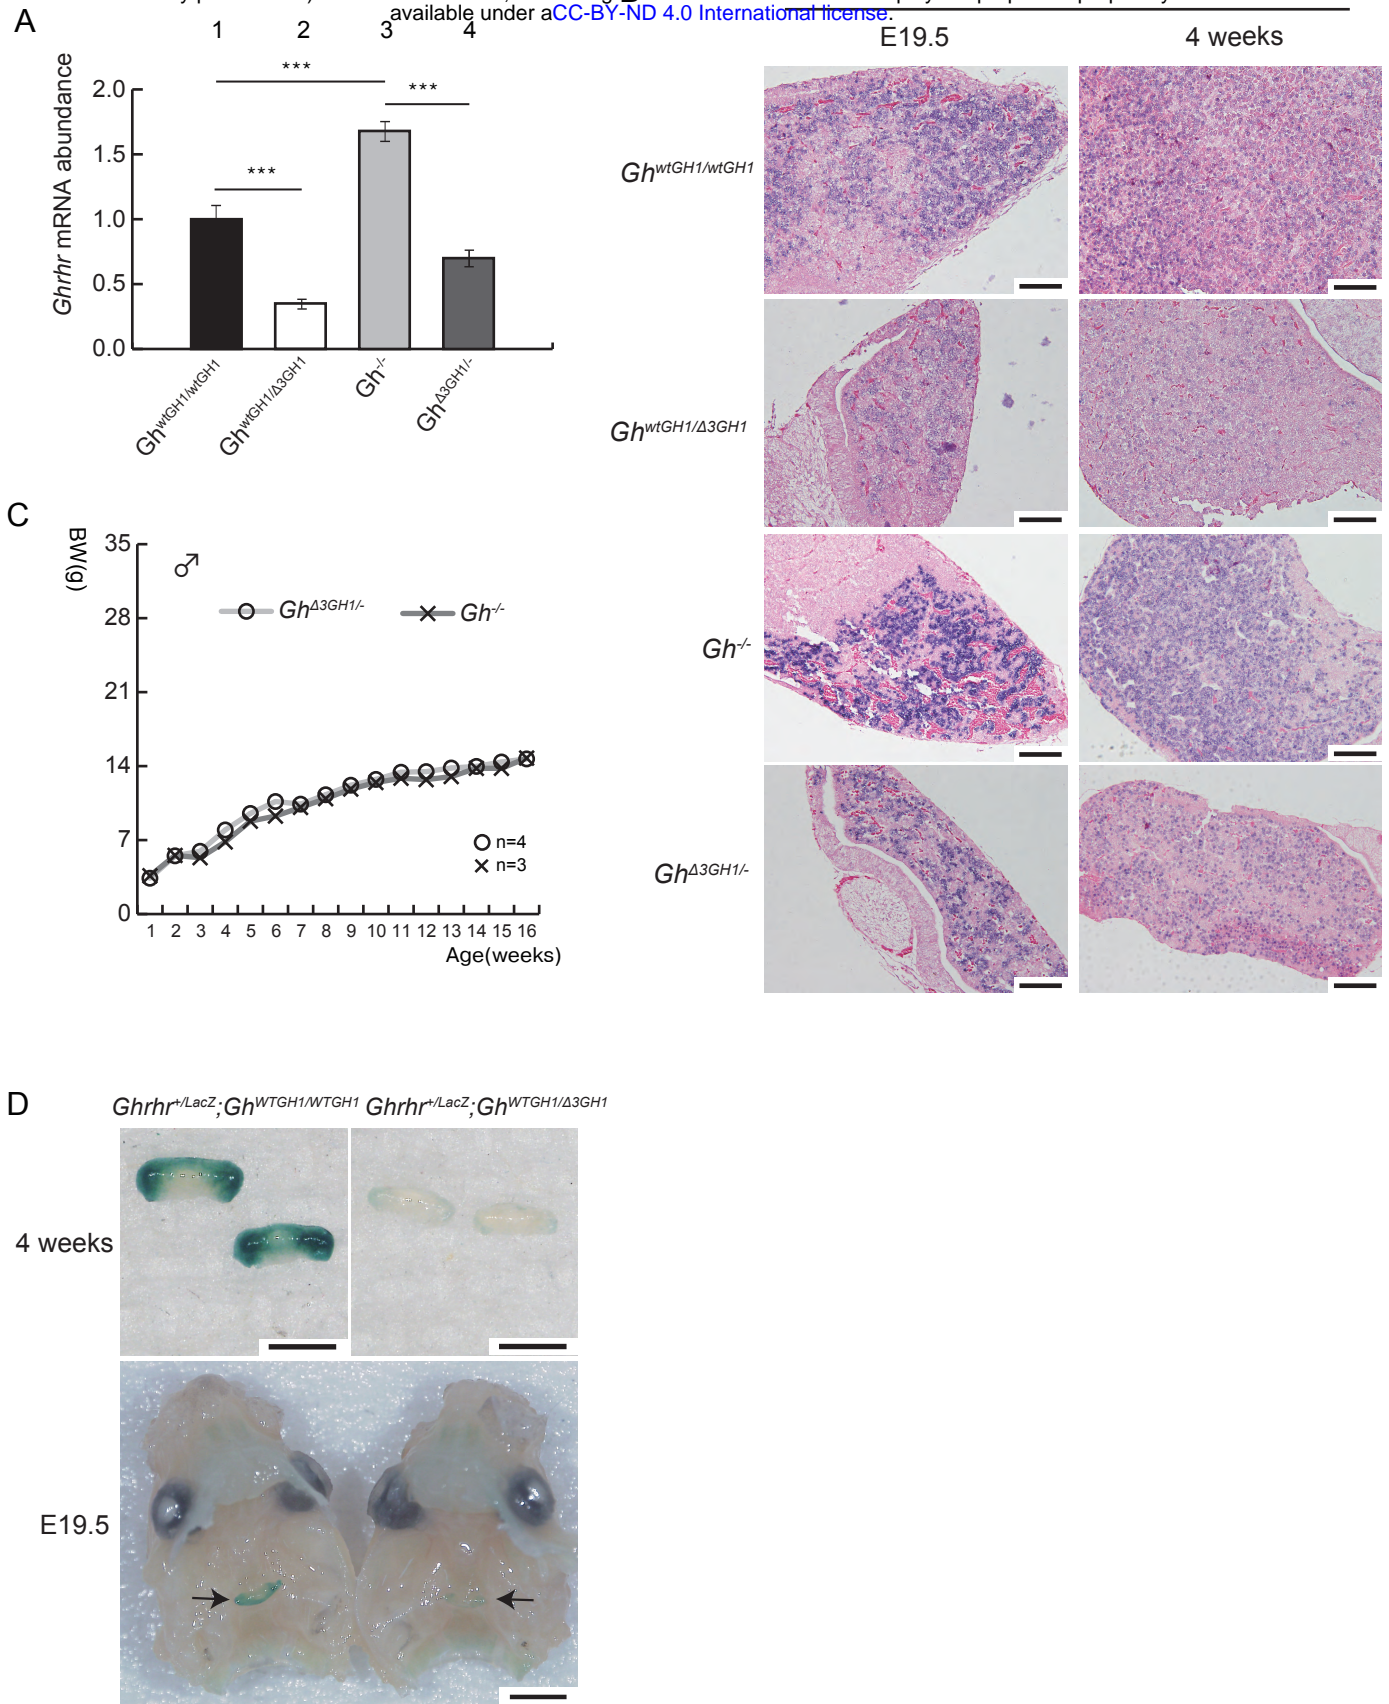

Figure 6

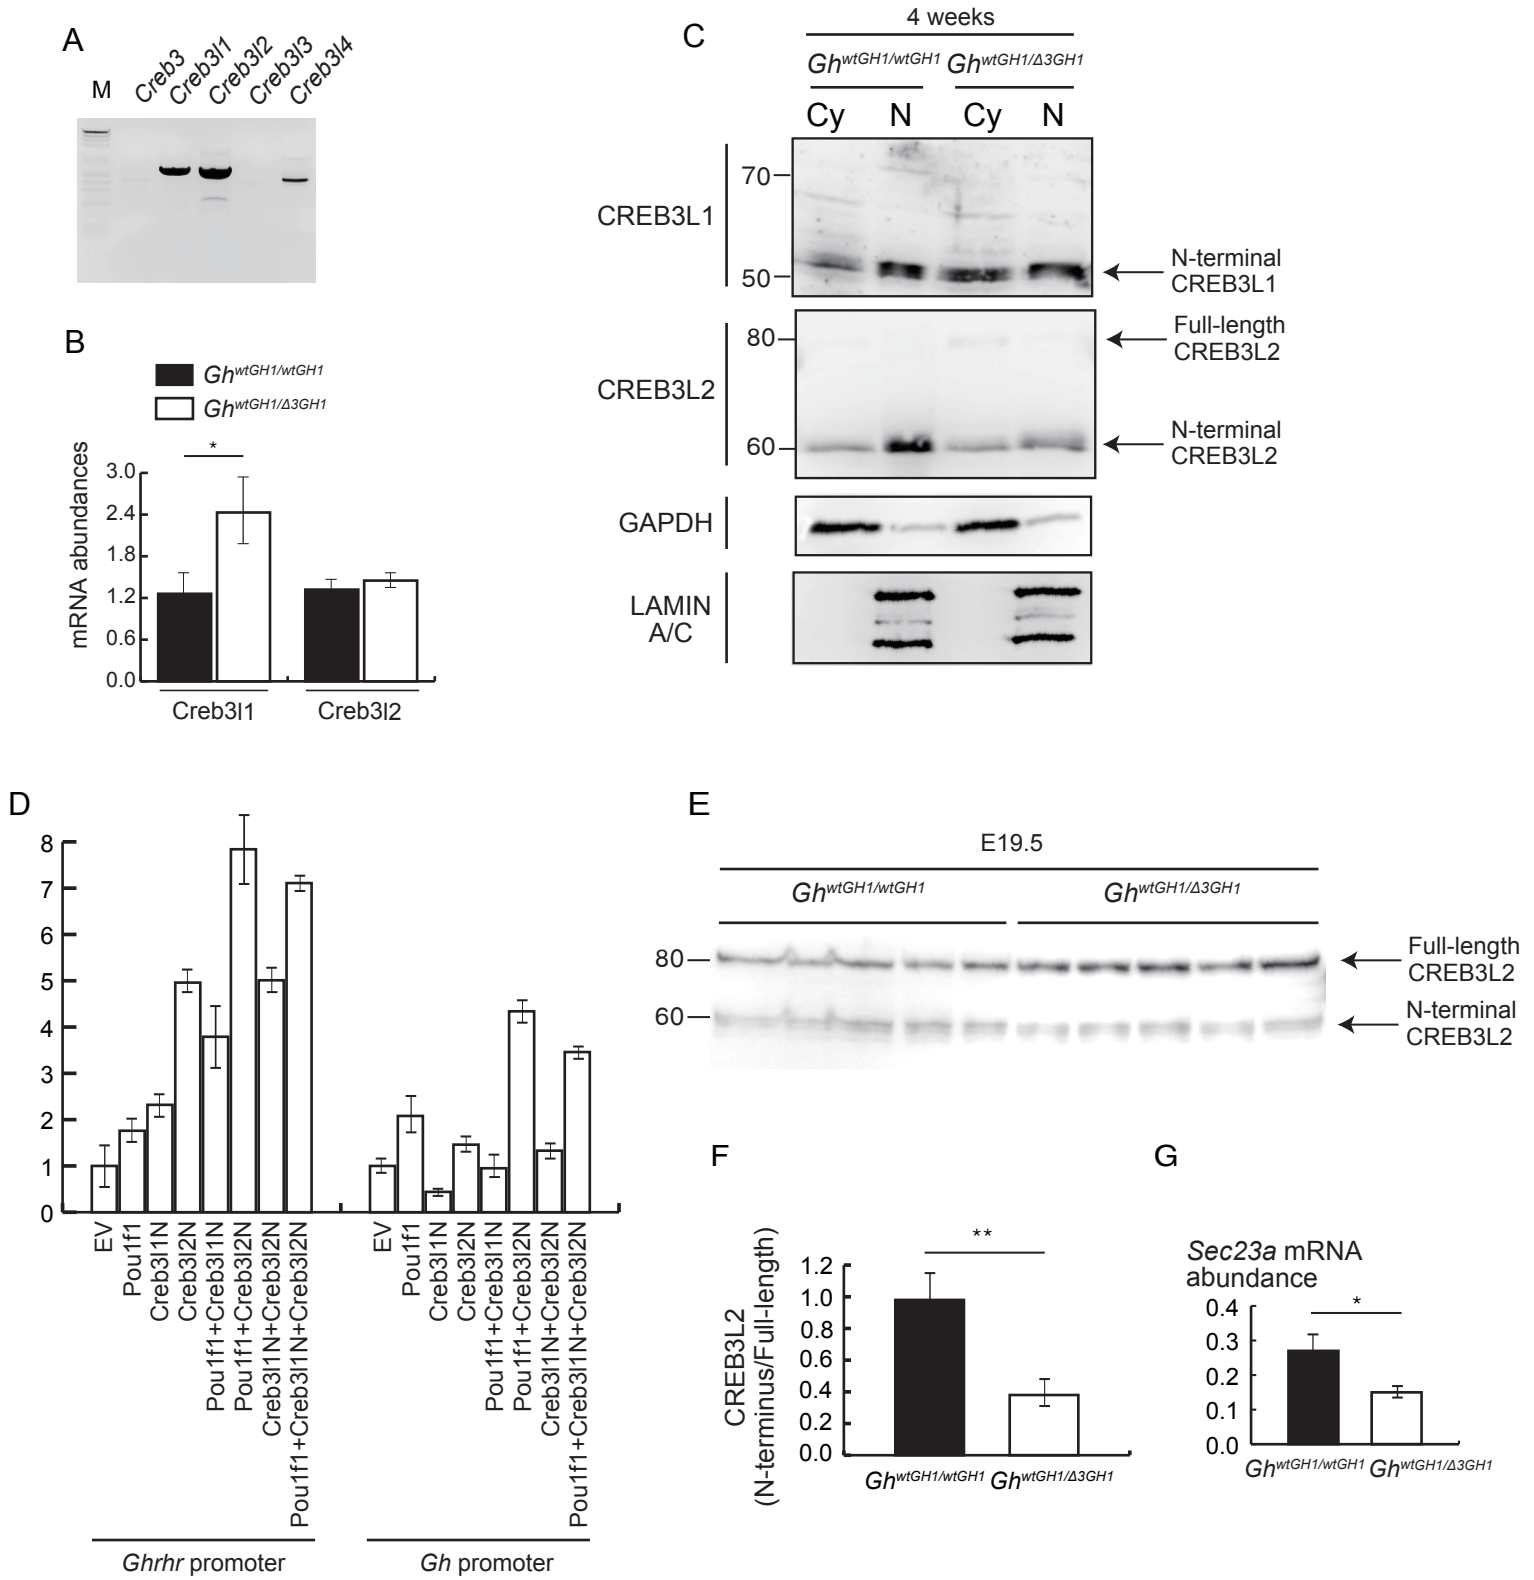

Figure 7

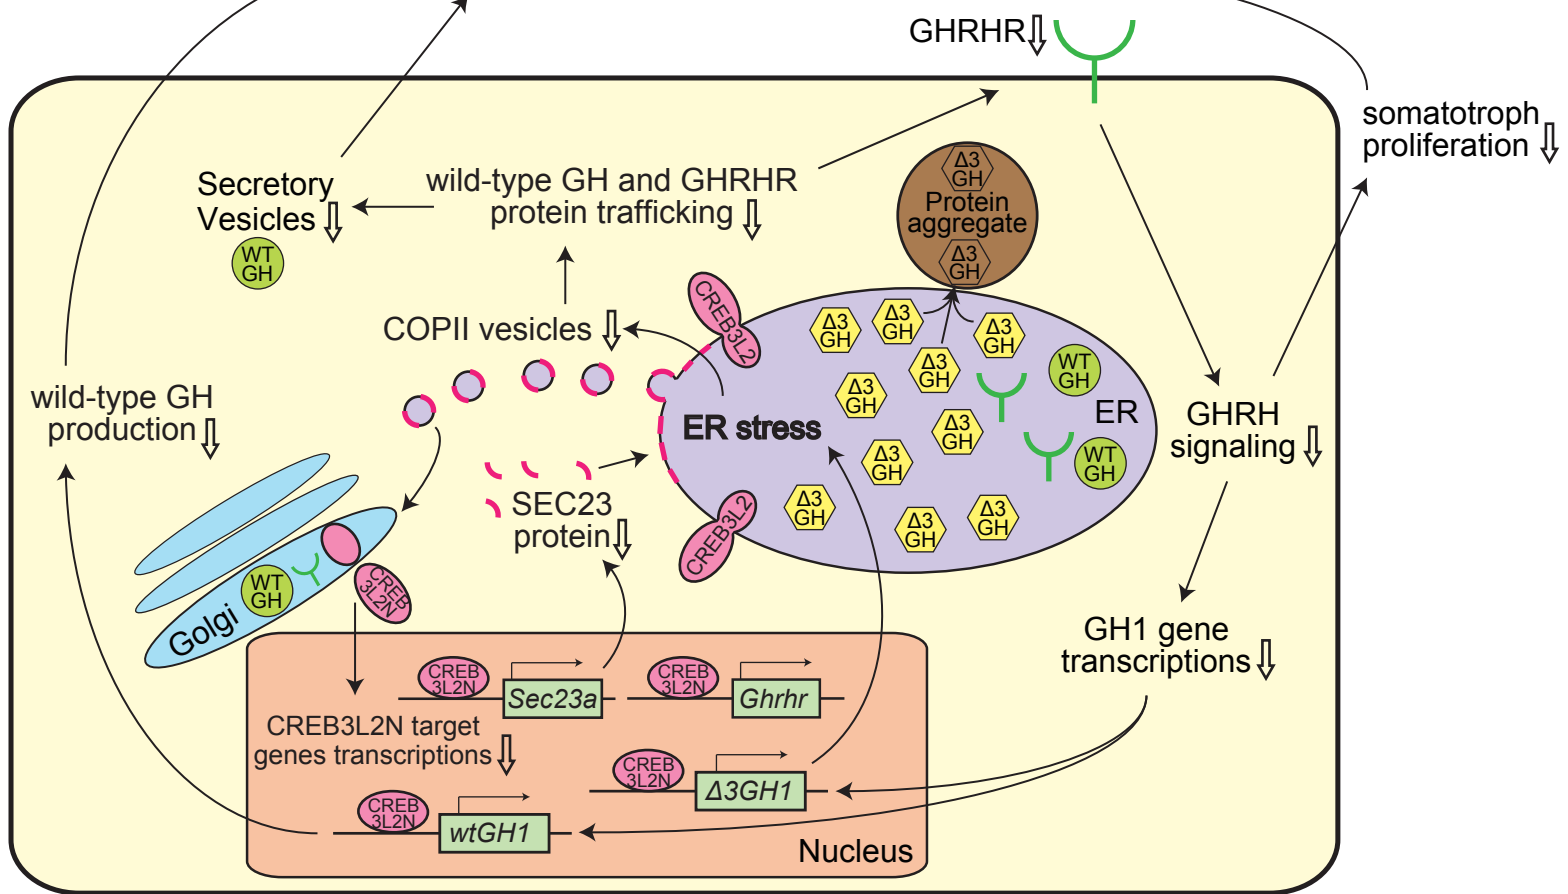



# Expanded View Figure 1

bioRxiv preprint doi: <https://doi.org/10.1101/545384>; this version posted February 8, 2019. The copyright holder for this preprint (which was not certified by peer review) is the author/funder, who has granted bioRxiv a license to display the preprint in perpetuity. It is made available under aCC-BY-ND 4.0 International license.

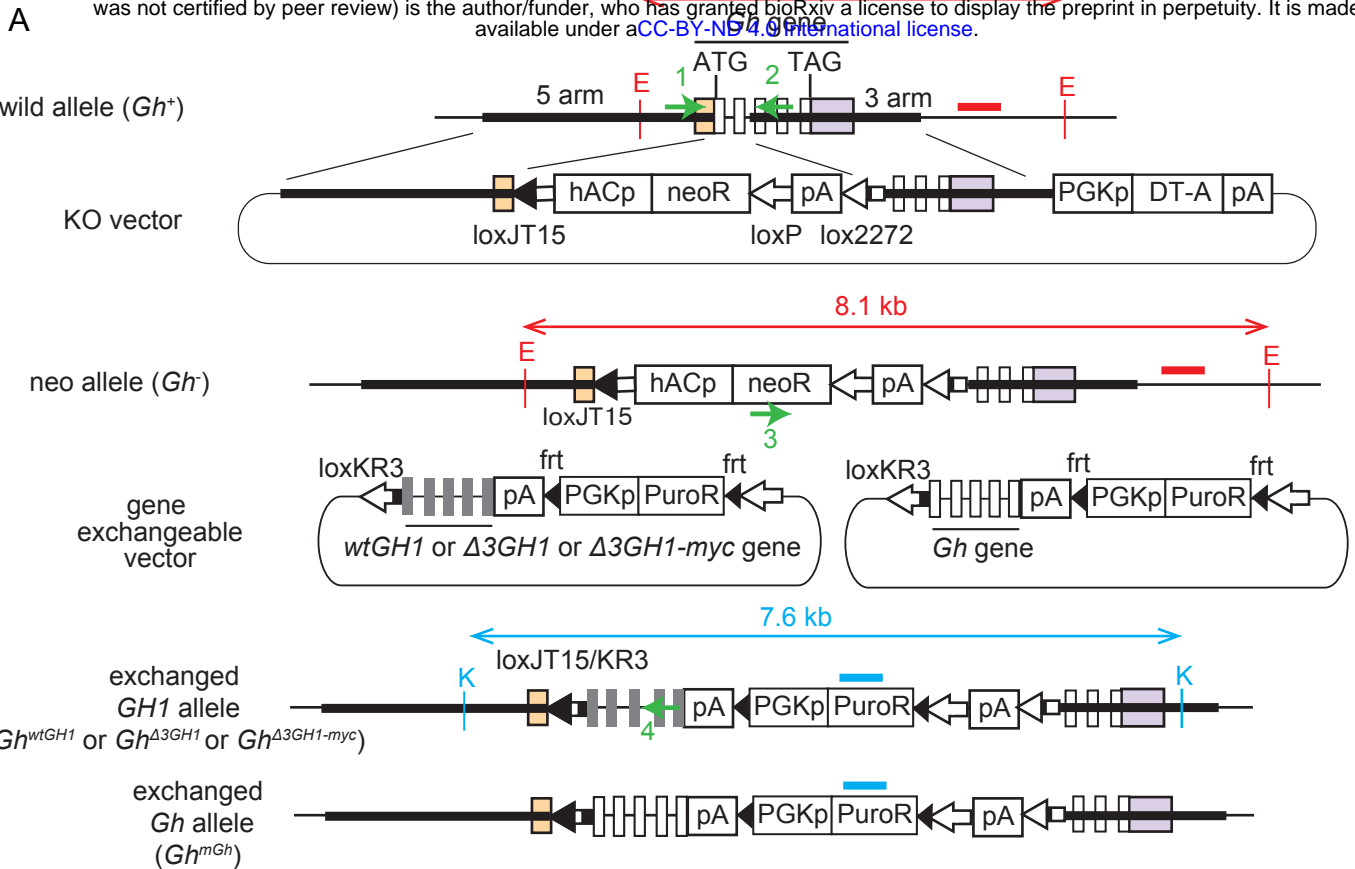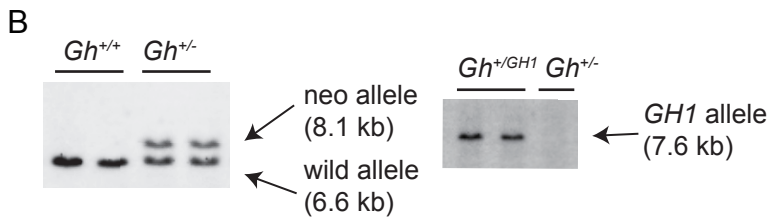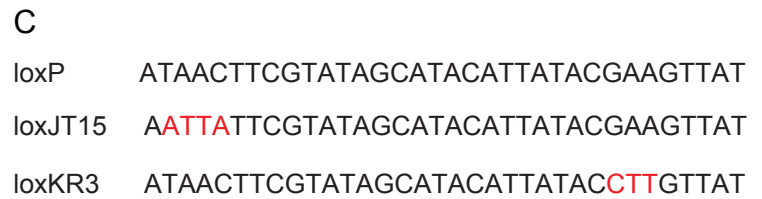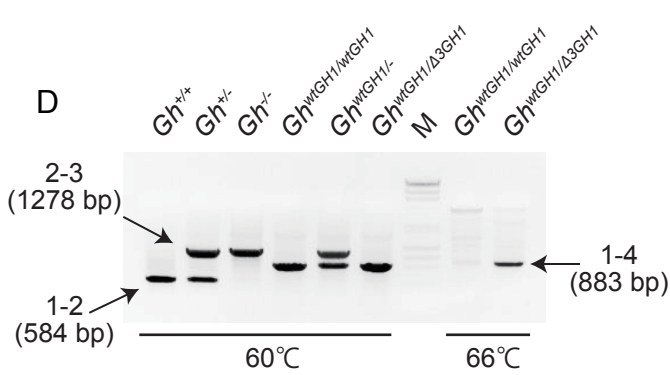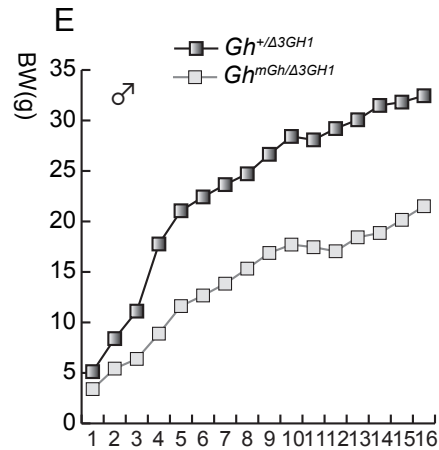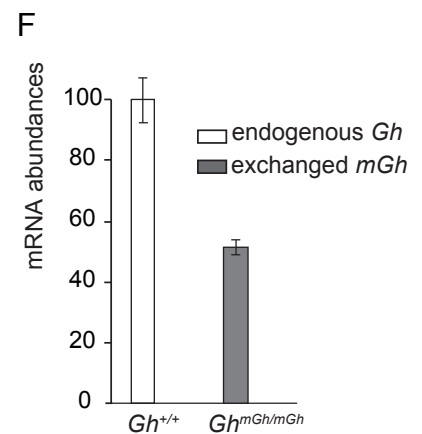

## Expanded View Figure 2

bioRxiv preprint doi: <https://doi.org/10.1101/545384>; this version posted February 8, 2019. The copyright holder for this preprint (which was not certified by peer review) is the author/funder, who has granted bioRxiv a license to display the preprint in perpetuity. It is made available under aCC-BY-ND 4.0 International license.

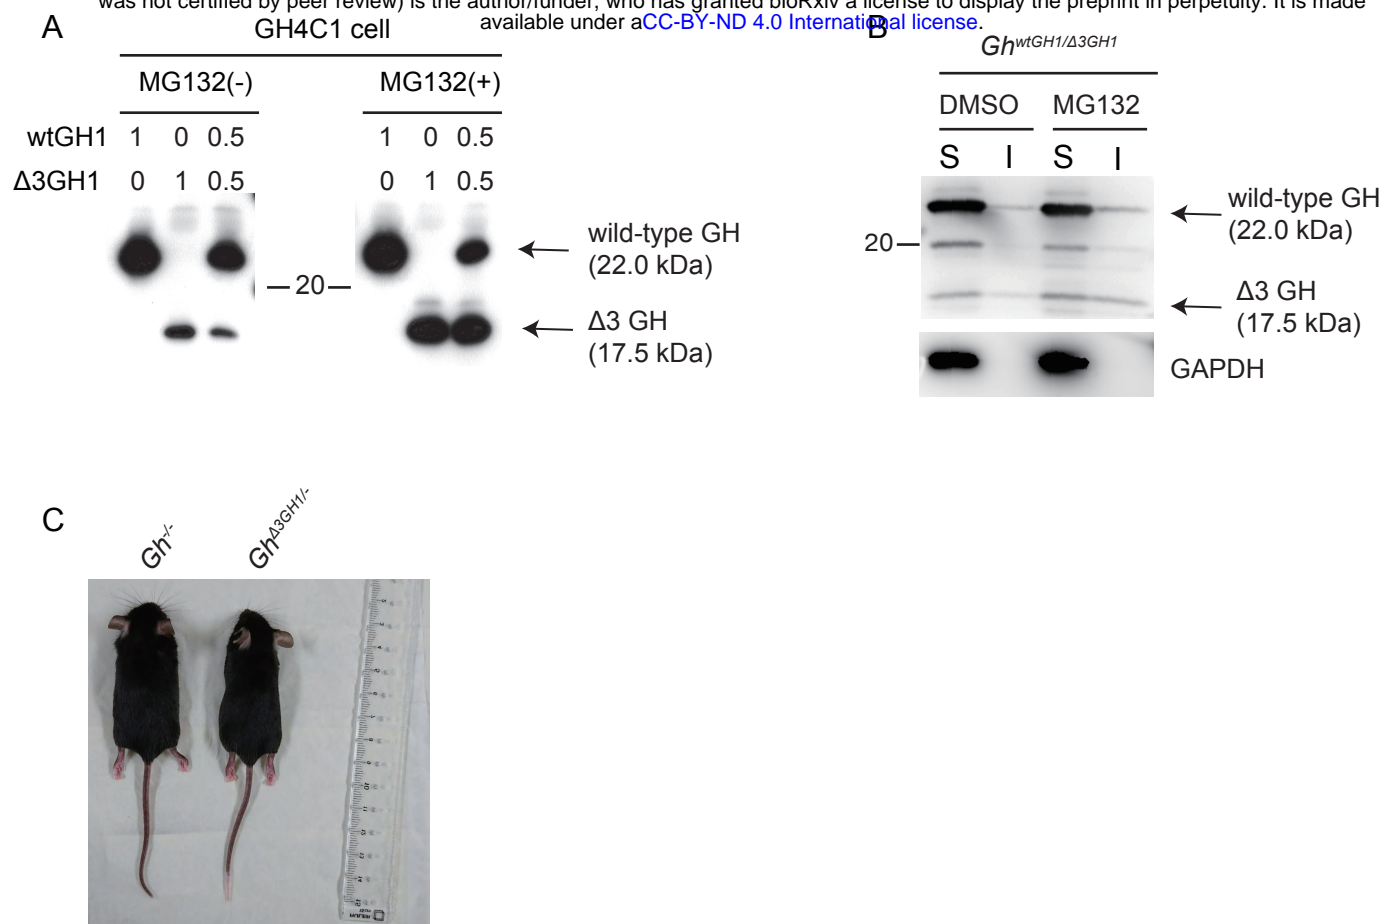

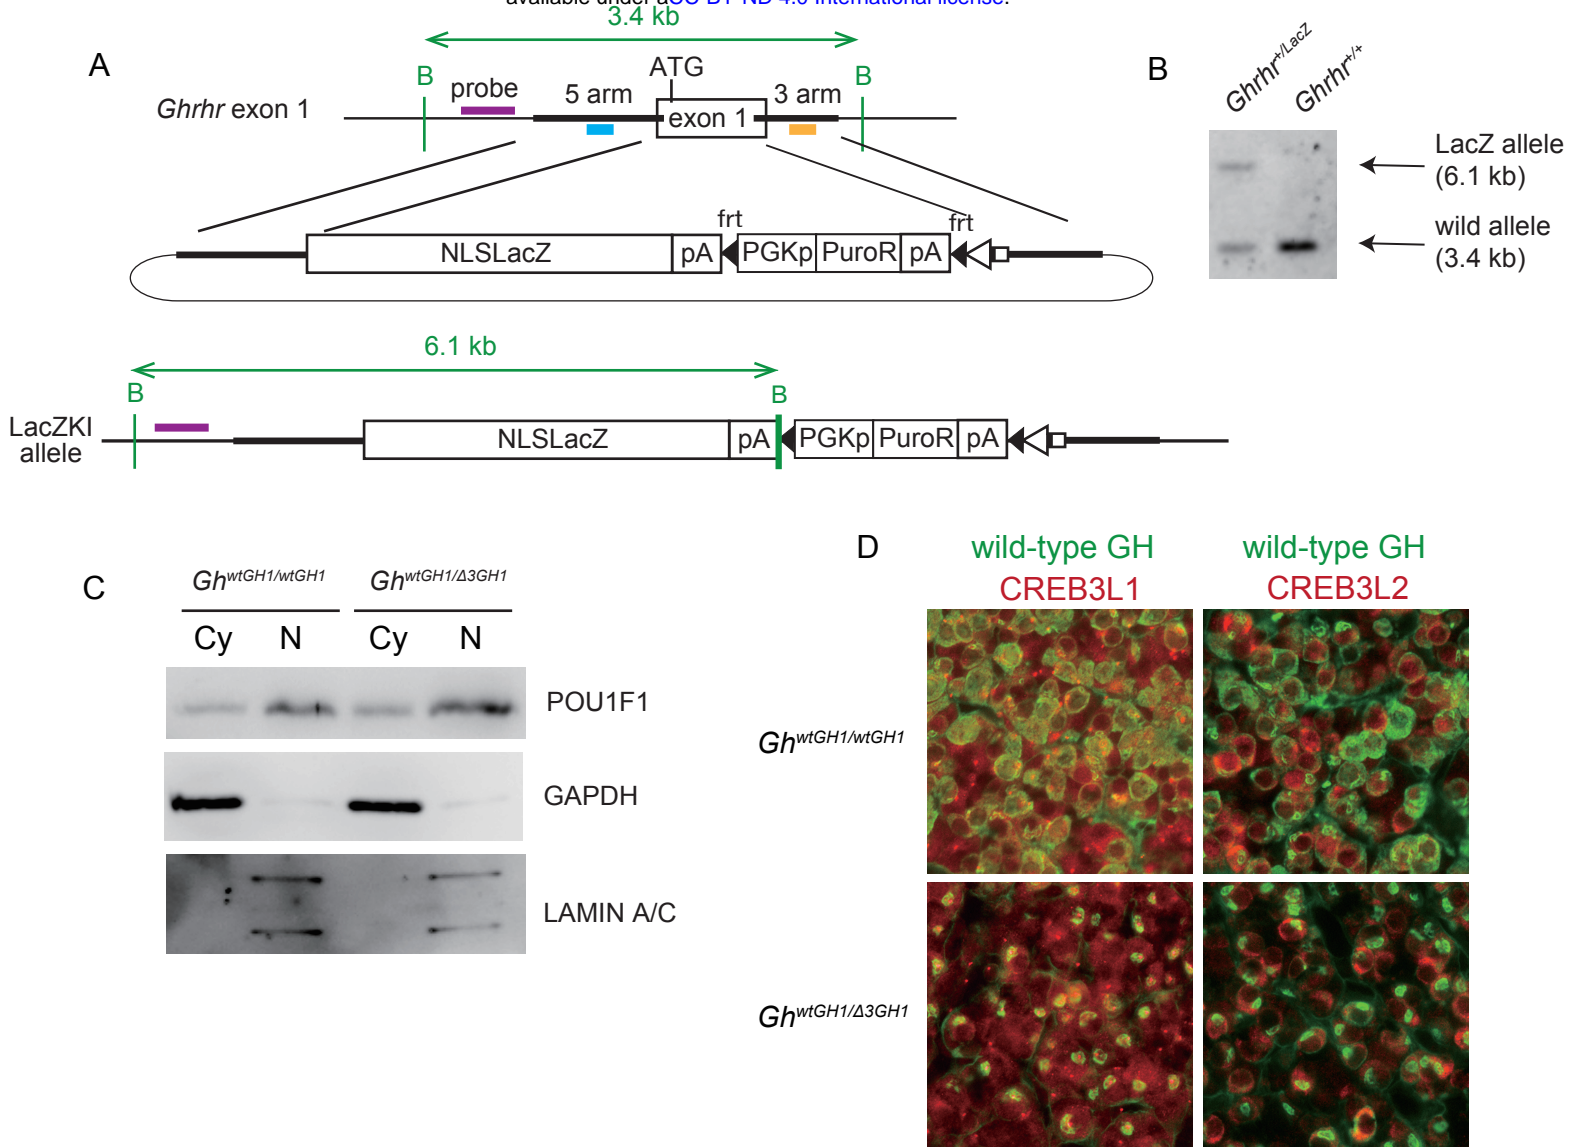

## Supplementary table 1

### Sequences of primers used in this study.

|                |                                             |
|----------------|---------------------------------------------|
| Primer 1       | AGTCCAGATTCCAAACTGCT                        |
| Primer 2       | AAGAAGGGTGGTCACTGAGG                        |
| Primer 3       | AGAGGCTATTCCGGCTATGAC                       |
| Primer 4       | CCCTCTTCCGTAGGTGAGTA                        |
| Gh-5arm-F      | AGCAGGGAGCTCTCATCGCGAGTCACTGGAACATTG        |
| Gh-5arm-R      | CATTGCCGAGCTCTGATCTGTCCACAGGACTCTG          |
| Gh-3arm-F      | AGTAATGATGTCGACGAGACACAAGCTG                |
| Gh-3arm-R      | ATATATGCAGGTCGACATAGAGACCAGAAG              |
| GH1-gf1        | GCTGTGACAGCTCACCTAGC                        |
| GH1-gr1        | TAGGAATTCTAGAAAGCCACAGCTGCCCTCCACAGAG       |
| GH1IVS3-F      | CCCAGGCGGGGATGGGGGA                         |
| GH1IVS3dsmut-R | GAGAAGGCATCCACTCACGGATT                     |
| GH1-cf1        | TCCTGTGGACAGCTCACCTAG                       |
| GH1-cr1        | CTAGAAGCCACAGCTGCCCT                        |
| GH1ex3-f1      | TTCAGATCTGAAGAAGCCTATATCCCAAAG              |
| GH1ex3-r1      | TCCGATATCGGATTTCTGTTGTGTTTCCTC              |
| Ghrhr-5arm-f5  | TTCTCGTTGGAATTCTCAGCTCACCCCTC               |
| Ghrhr-5arm-r5  | AATGGTGTCTGAATTCAGCCTTCCCTC                 |
| Ghrhr-3arm-f6  | CAGACCTTTGTTCTCGAGGGTGGTGGCAG               |
| Ghrhr-3arm-r6  | CAGAGGCAAACGAAAGCTCGAGTCACAG                |
| Ghrhr-vf1      | CATAGATCTATGGATGGCCTGATGTGGGC               |
| Ghrhr-vr1      | TAGCTCGAGCTAGCACTCAGAGGTCAGCA               |
| Ghrhr-CRI-f1   | CACCGAGTAAGGCTATTGGTGAAC                    |
| Ghrhr-CRI-r1   | AAACGTTACCAATAGCCTTACTC                     |
| Ghrhr-CRI-f2   | CACCAGAAACCAGCTACTGCTCCC                    |
| Ghrhr-CRI-r2   | AAACGGGAGCAGTAGCTGGTTTCT                    |
| Ghrhr-CRI-f4   | CACCGGATCAAAGTCACTCAGAGA                    |
| Ghrhr-CRI-r4   | AAACTCTCTGAGTGACTTTGATCC                    |
| Ghrhr-CRI-f5   | CACCCTCTCTCTGGGACTCACACC                    |
| Ghrhr-CRI-r5   | AAACGGTGTGAGTCCCAGAGAGAG                    |
| Xbp1-f1        | AGGCCAAGGGGAGTGGAGTA                        |
| Xbp1-r1        | AGGCAACAGTGTCAGAGTCC                        |
| wtGH1-qr1      | AGCCTATATCCCAAAGGAAC                        |
| wtGH1-qr1      | AGCAGCTCTAGGTTGGATTT                        |
| Ghrhr-qr1      | TCTCTCACTTCGGCTCAGACAC                      |
| Ghrhr-qr1      | TCTTACCGTGGAGAAGTACGA                       |
| Actb-qr1       | TCTGTGTGGATCGGTGGCTCCA                      |
| Actb-qr1       | CCTGCTTGTGATCCACATCTG                       |
| WZ-14          | GCTCTCTACAGGTGGATCAAG                       |
| WZ-17          | GCAGTTCAATCAGCTGCTTTC                       |
| Hspa5-qr2      | AACTGTAACAATCAAGGTCT                        |
| Hspa5-qr2      | CAAAAGTGACTTCAATCTGG                        |
| Pou1f1-vf1     | CATGGTACCATGAGTTGCCAATCTTTCACCTC            |
| Pou1f1-vr1     | TAAGGTACCTTATCTGCACTCTAGATGTTCC             |
| Creb3l1-vf1    | CATGGTACCATGGACGCCGTCTTGGAAACC              |
| Creb3l1-vr1    | TAGGGTACCCTAGGAGAGTTTGTGGTGG                |
| Creb3l1 ex2-1  | UUUCUUUGAUGACCCUGUGCGUUUUAGAGCUAUGCUGUUUUUG |
| Creb3l1 ex2-2  | GAGCACAGCUACUCCCUGAGGUUUUAGAGCUAUGCUGUUUUUG |
| Creb3l2-vf1    | CATGAATTCATGGAGGTGCTGGAGAGCGG               |
| Creb3l2-vr1    | TGAGAATTCTCAGAAGGTGGCGTTCACTCT              |
| Luman-cf1      | CATGAATTCATGGATCCTGGTGGTCAGGAT              |
| Luman-cr1      | TAGGAATTCTAACCTGAATACCTGCCCTG               |
| CrebH-cf1      | CATAGATCTATGGATGGGGACATAGCGGCT              |
| CrebH-cr1      | TGAAGATCTTACAGCACCCCAATGCATC                |
| loxP-CRI-f1    | AGGGGTATGCTATACGAAGTTATT                    |
| loxP-CRI-r1    | AAACAATAACTTCGTATAGCATAC                    |
